# Supplementary material
Source: publisher figshare collection journal article supplement (https://acs.figshare.com/ndownloader/files/4012906)
Supplement: Supplementary file 1 [file 4012906]

# Combined NMR Analysis of Huge Residual Dipolar Couplings and Pseudocontact Shifts in Terbium(III)-Phthalocyaninato Single Molecule Magnets

Marko Damjanovic,<sup>†</sup> Keiichi Katoh,<sup>‡,§</sup> Masahiro Yamashita,<sup>‡,§</sup> and Markus Enders<sup>\*†</sup>

Institute of Inorganic Chemistry, University of Heidelberg, Im Neuenheimer Feld 270, D-69120  
Heidelberg, Germany; Department of Chemistry, Graduate School of Science, Tohoku University, 6-3  
Aramaki-Aza-Aoba, Sendai 980-8578, Japan; JST, CREST, 4-1-8 Honcho, Kawaguchi, Saitama 332-  
0012, Japan

\* To whom correspondence should be addressed. Tel: +49-6221-546247, Fax: +49-6221-541616247,  
E-mail: markus.enders@uni-hd.de

<sup>†</sup> University of Heidelberg <sup>‡</sup> Tohoku University <sup>§</sup> CREST (JST)

## Supporting Information

### Table of Contents:

|                                                                                                                                       |     |
|---------------------------------------------------------------------------------------------------------------------------------------|-----|
| I. <sup>1</sup> H and <sup>13</sup> C NMR spectra of complex <b>1</b> in CD <sub>2</sub> Cl <sub>2</sub> (Fig. S1-S13) .....          | S2  |
| II. The model for fitting the <sup>13</sup> C NMR pseudocontact shifts (Fig. S14-S18, Table S1-S15) .....                             | S10 |
| III. <sup>1</sup> H and <sup>13</sup> C NMR spectra of complex <b>1</b> in toluene-d <sup>8</sup> (Fig. S19-S21, Table S16-S17) ..... | S22 |
| IV. Isointensity plots and estimated pseudocontact shifts (Eq. S1-S6, Fig. S22-S23, Table S18-S19) .....                              | S25 |
| V. <sup>1</sup> H NMR pcs according to the model established for fitting the <sup>13</sup> C NMR data (Table S20-S22) .....           | S30 |
| VI. Measured total couplings (Table S23-S26) .....                                                                                    | S33 |
| VII. Dynamic frequency shifts (Eq. S7-S11, Fig. S24, Table S27-S29) .....                                                             | S35 |
| VIII. Residual dipolar couplings and the order parameter (Fig. S25-S26, Table S30-S36) .....                                          | S39 |
| IX. Additional information (Eq. S12-S14, Fig. S27-S29, Table S37) .....                                                               | S43 |
| X. Experimental section (Table S38) .....                                                                                             | S46 |
| XI. X-ray structure of complex <b>1</b> (Fig. S30-S32) .....                                                                          | S49 |
| XII. Literature .....                                                                                                                 | S51 |

I.  $^1\text{H}$  and  $^{13}\text{C}$  NMR spectra of complex **1** in  $\text{CD}_2\text{Cl}_2$  (Fig. S1-S13)

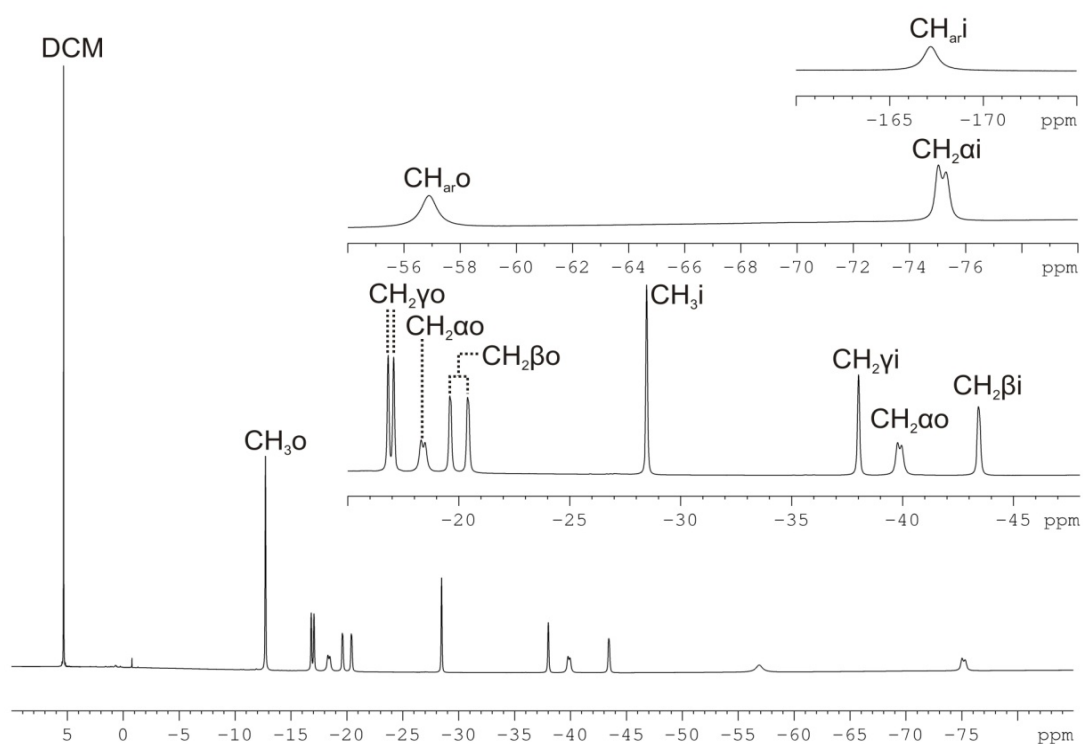

**Figure S1.**  $^1\text{H}$  NMR spectrum of **1** dissolved in  $\text{CD}_2\text{Cl}_2$ , with selected enlarged segments and annotations of assignments. Spectrum was recorded at 14.09 T, at a temperature of 295.0 K.

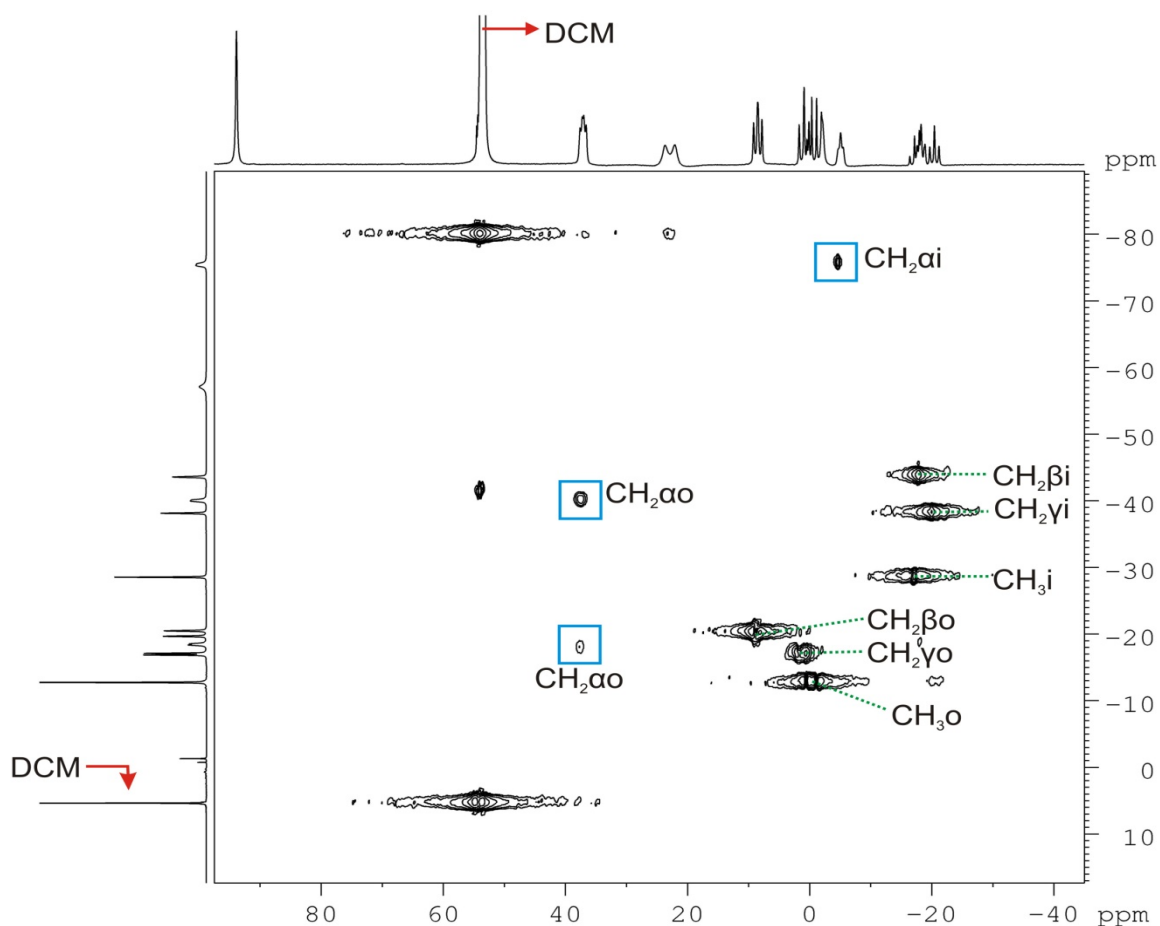

**Figure S2.**  $^1\text{H}$ ,  $^{13}\text{C}$  NMR correlation spectrum (HETCOR,  $^{13}\text{C}$  in F2, horizontal) of compound **1** dissolved in  $\text{CD}_2\text{Cl}_2$ , recorded at 14.09 Tesla, at a temperature of 295.0 K. The crosspeaks of all the aliphatic groups are present. The assignments of aromatic resonances, that did not show crosspeaks in this experiment due to their fast relaxation, were made based on the values of the observed chemical shifts.

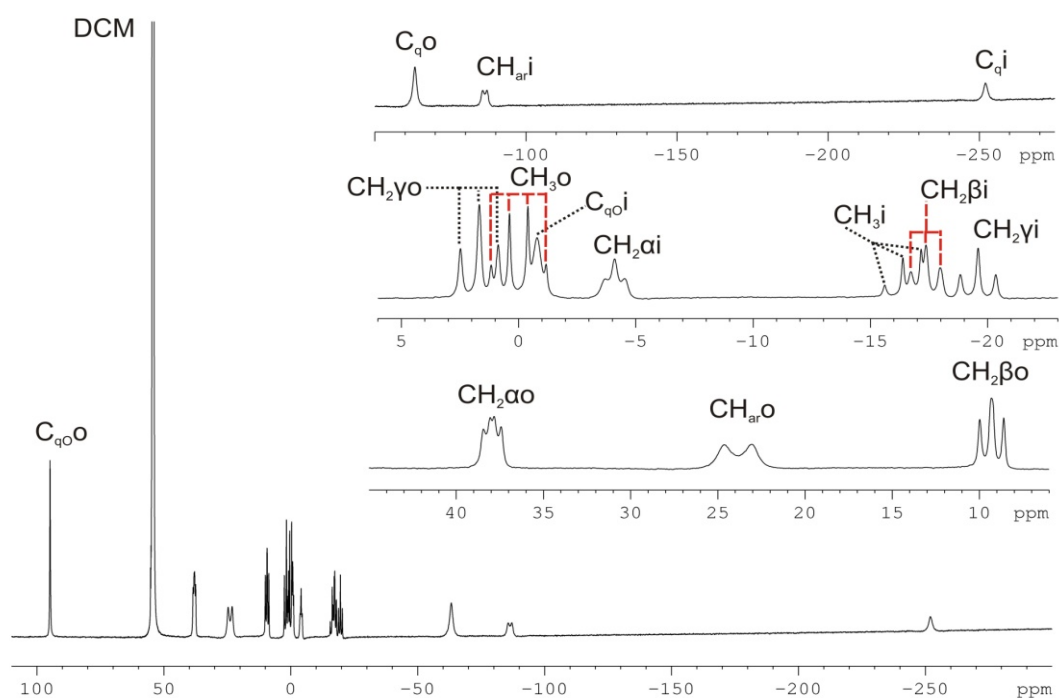

**Figure S3.**  $^{13}\text{C}$  NMR spectrum of **1** dissolved in  $\text{CD}_2\text{Cl}_2$ , with assignments. Spectrum was recorded at 14.09 T, at a temperature of 295.0 K.

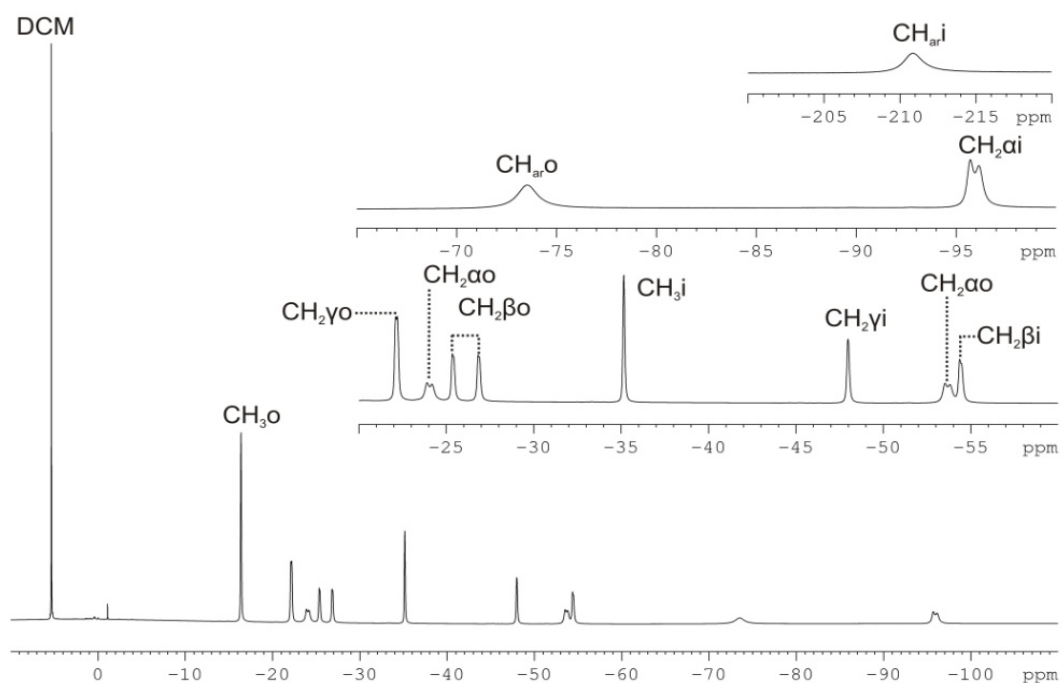

**Figure S4.**  $^1\text{H}$  NMR spectrum of **1** dissolved in  $\text{CD}_2\text{Cl}_2$ , with assignments. Spectrum was recorded at 14.09 T, at a temperature of 265.0 K.

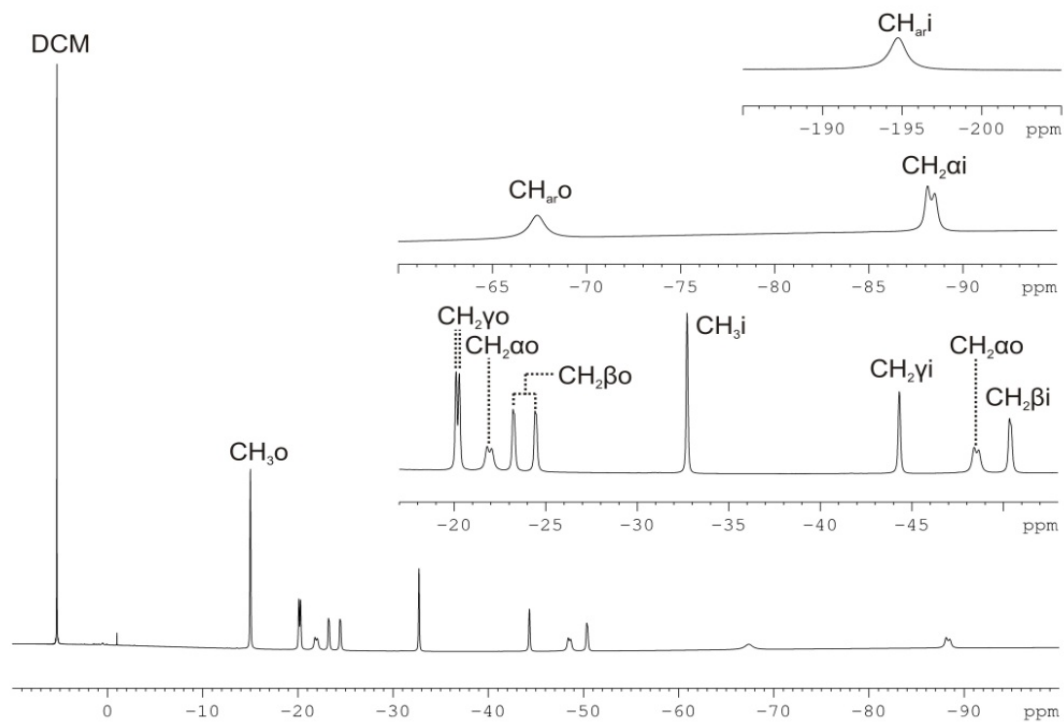

**Figure S5.**  $^1\text{H}$  NMR spectrum of **1** dissolved in  $\text{CD}_2\text{Cl}_2$ , with assignments. Spectrum was recorded at 14.09 T, at a temperature of 275.0 K.

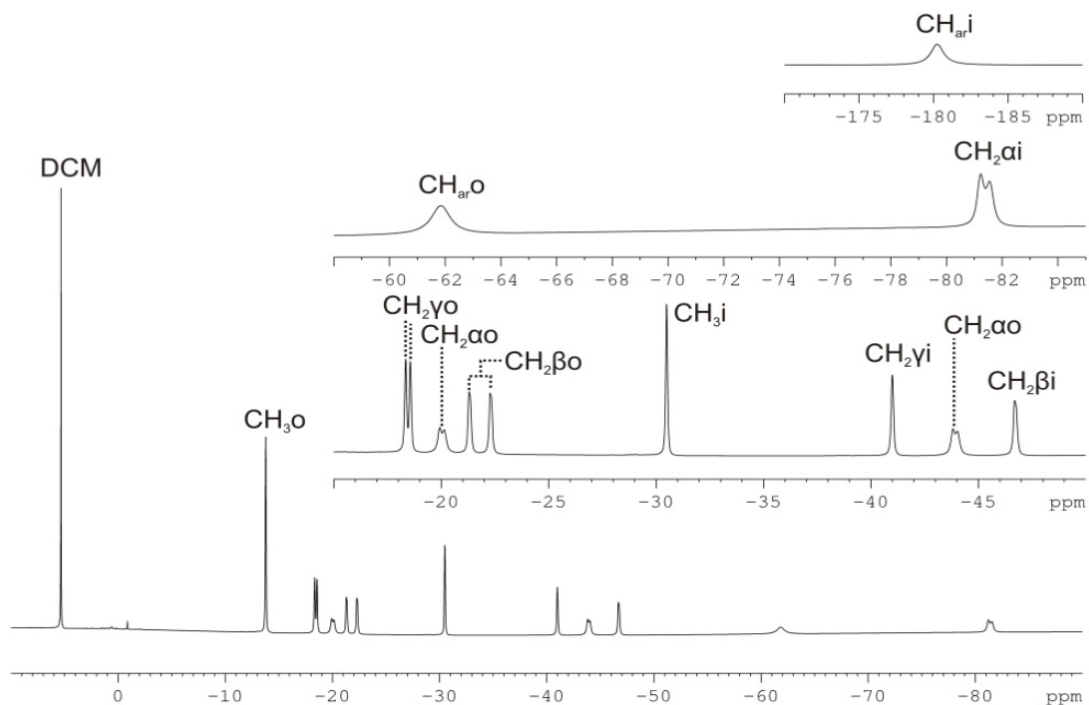

**Figure S6.**  $^1\text{H}$  NMR spectrum of **1** dissolved in  $\text{CD}_2\text{Cl}_2$ , with assignments. Spectrum was recorded at 14.09 T, at a temperature of 285.0 K.

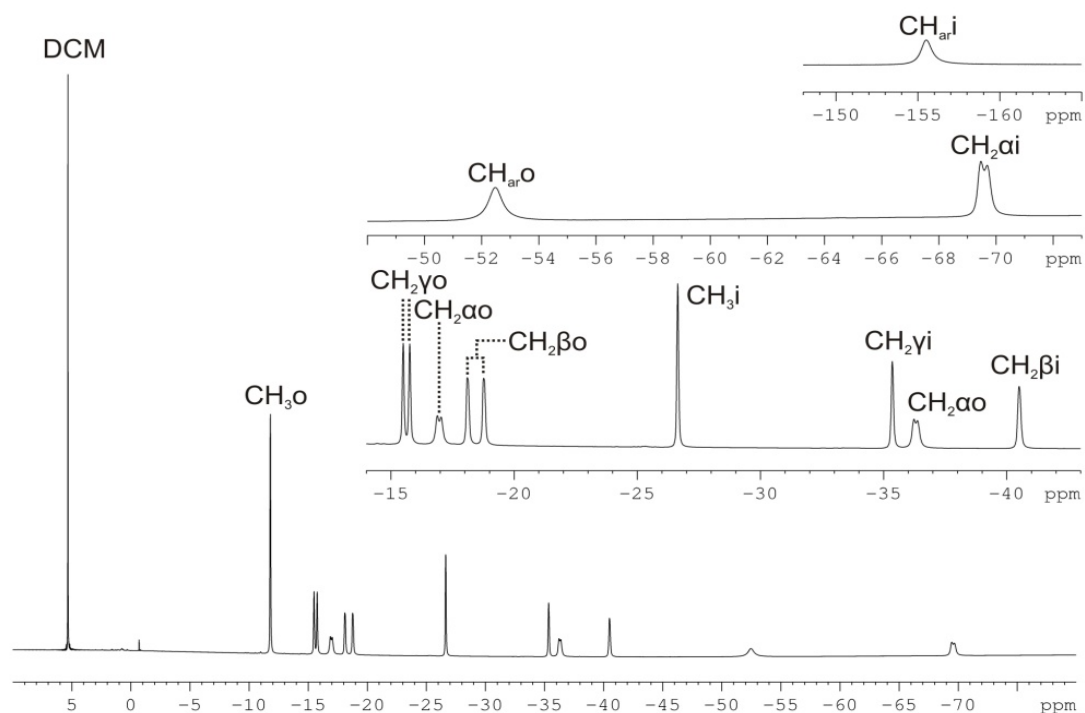

**Figure S7.**  $^1\text{H}$  NMR spectrum of **1** dissolved in  $\text{CD}_2\text{Cl}_2$ , with assignments. Spectrum was recorded at 14.09 T, at a temperature of 305.0 K.

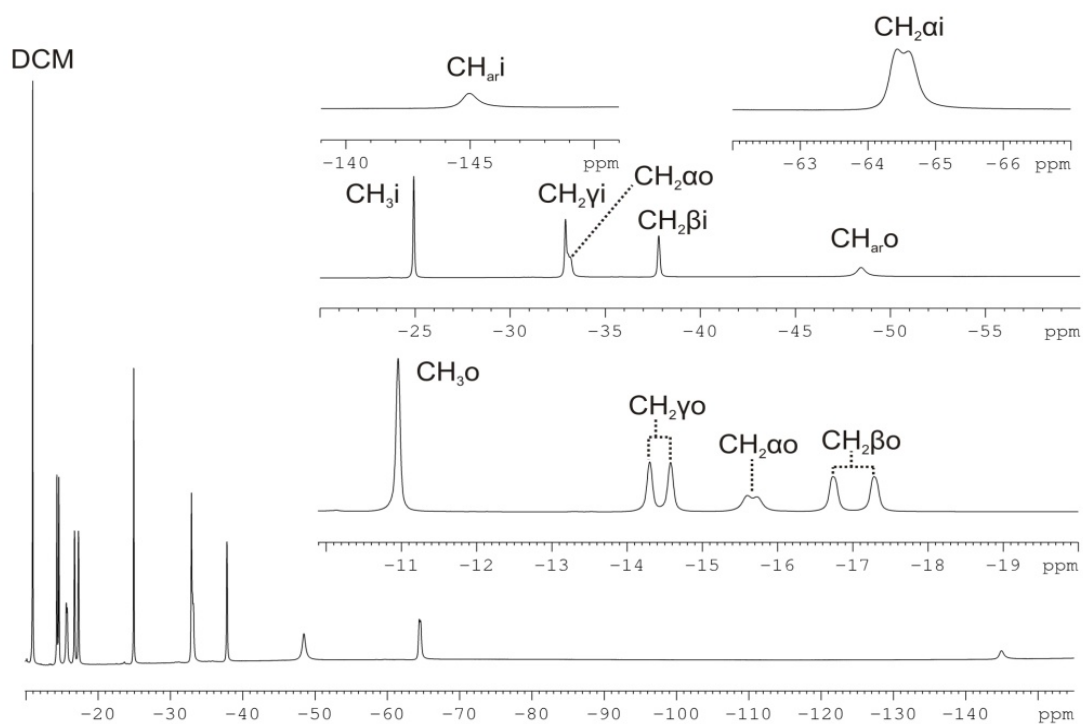

**Figure S8.**  $^1\text{H}$  NMR spectrum of **1** recorded in  $\text{CD}_2\text{Cl}_2$ , with assignments. Spectrum was recorded at 14.09 T, at a temperature of 315.0 K.

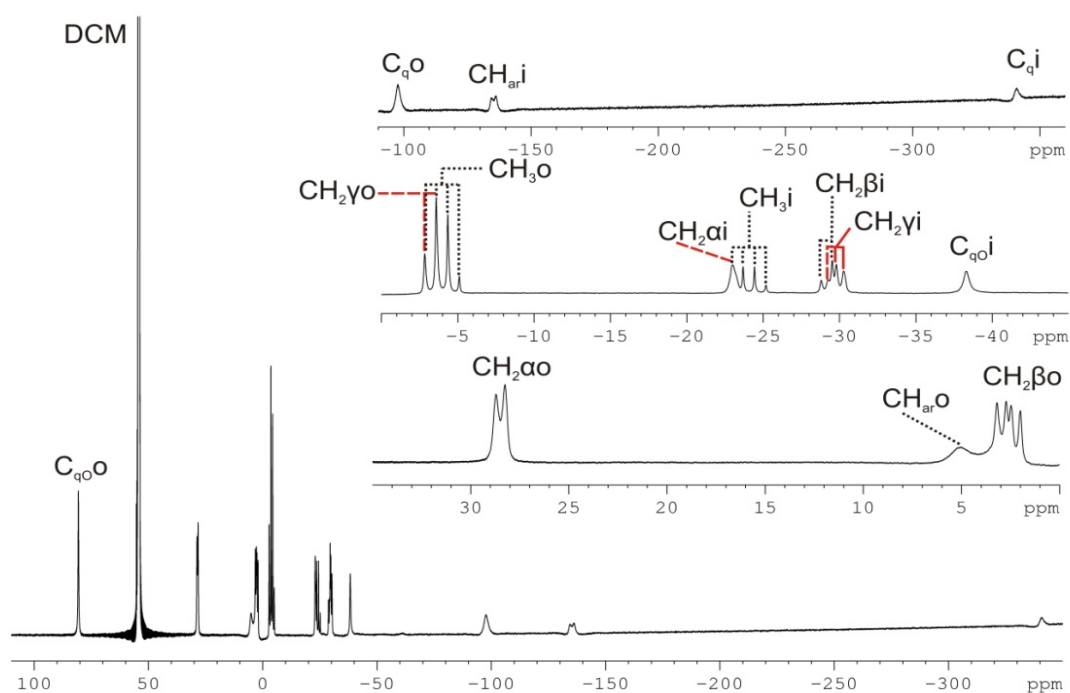

**Figure S9.**  $^{13}\text{C}$  NMR spectrum of **1** dissolved in  $\text{CD}_2\text{Cl}_2$ , with assignments. Spectrum was recorded at 14.09 T, at a temperature of 265.0 K.

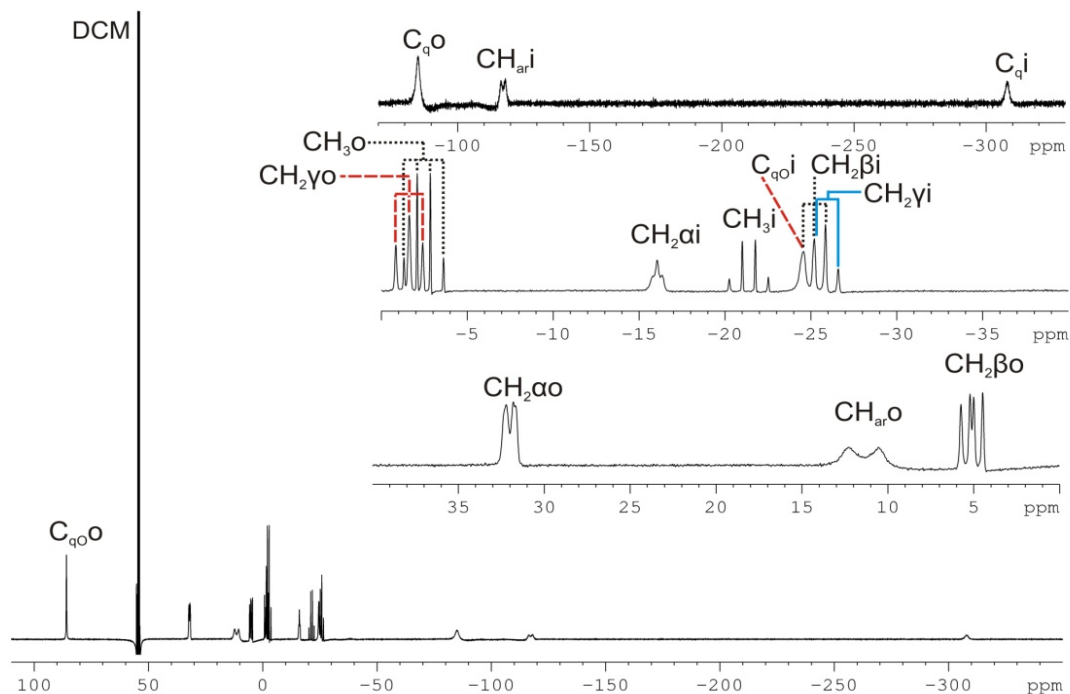

**Figure S10.**  $^{13}\text{C}$  NMR spectrum of **1** dissolved in  $\text{CD}_2\text{Cl}_2$ , with assignments. Spectrum was recorded at 14.09 T, at a temperature of 275.0 K.

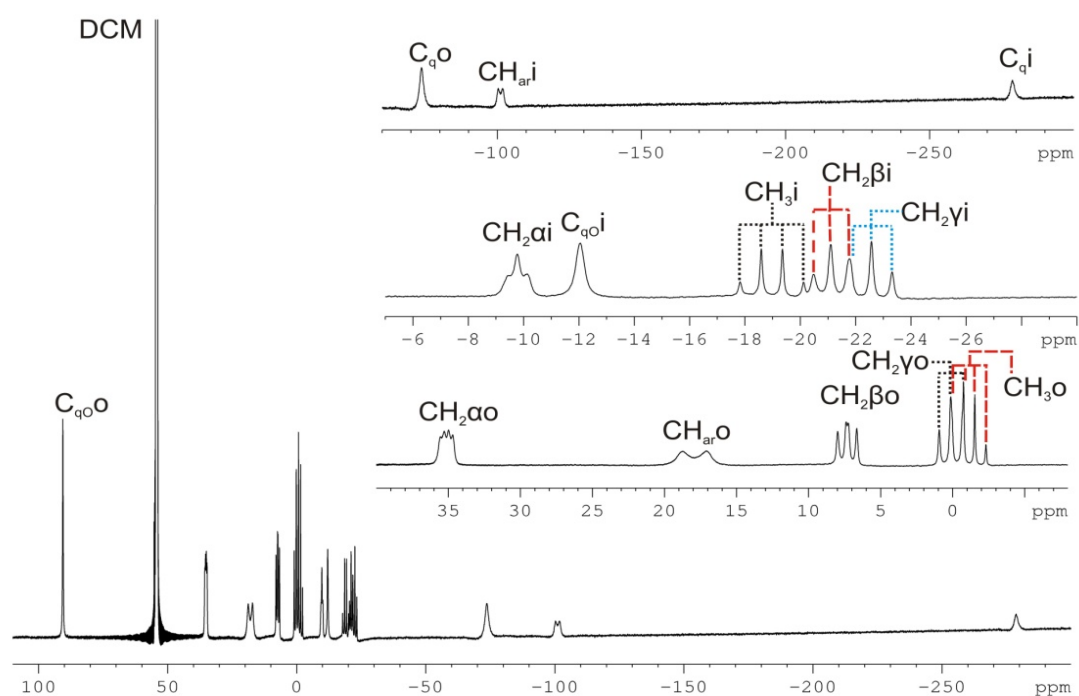

**Figure S11.**  $^{13}\text{C}$  NMR spectrum of **1** dissolved in  $\text{CD}_2\text{Cl}_2$ , with assignments. Spectrum was recorded at 14.09 T, at a temperature of 285.0 K.

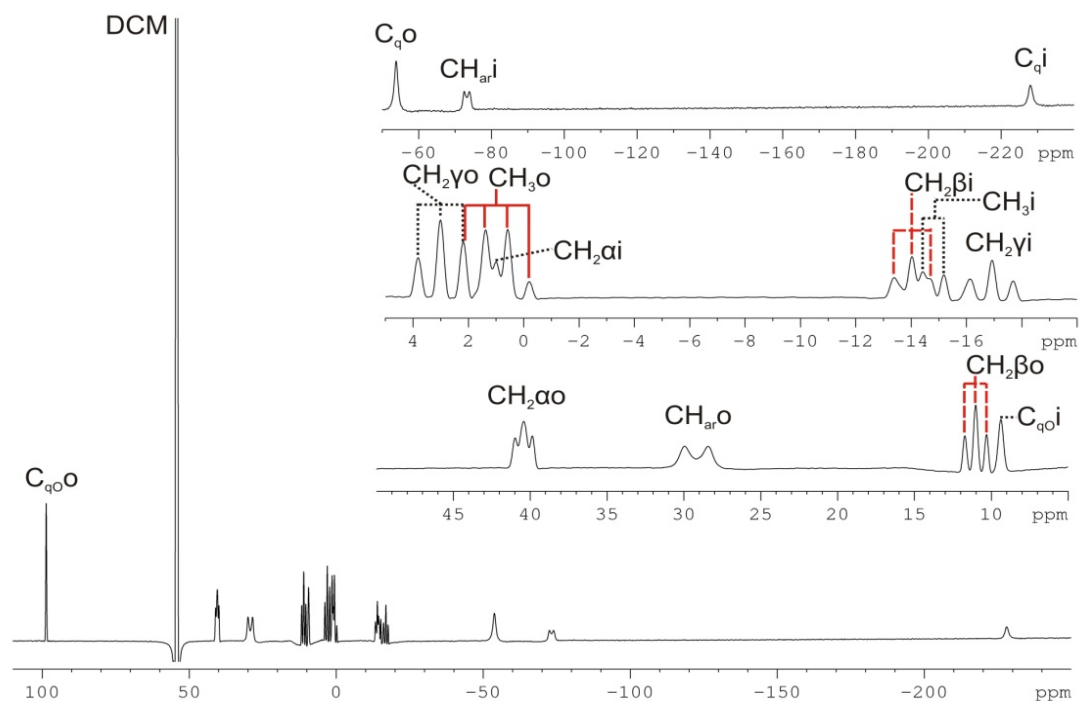

**Figure S12.**  $^{13}\text{C}$  NMR spectrum of **1** dissolved in  $\text{CD}_2\text{Cl}_2$ , with assignments. Spectrum was recorded at 14.09 T, at a temperature of 305.0 K.



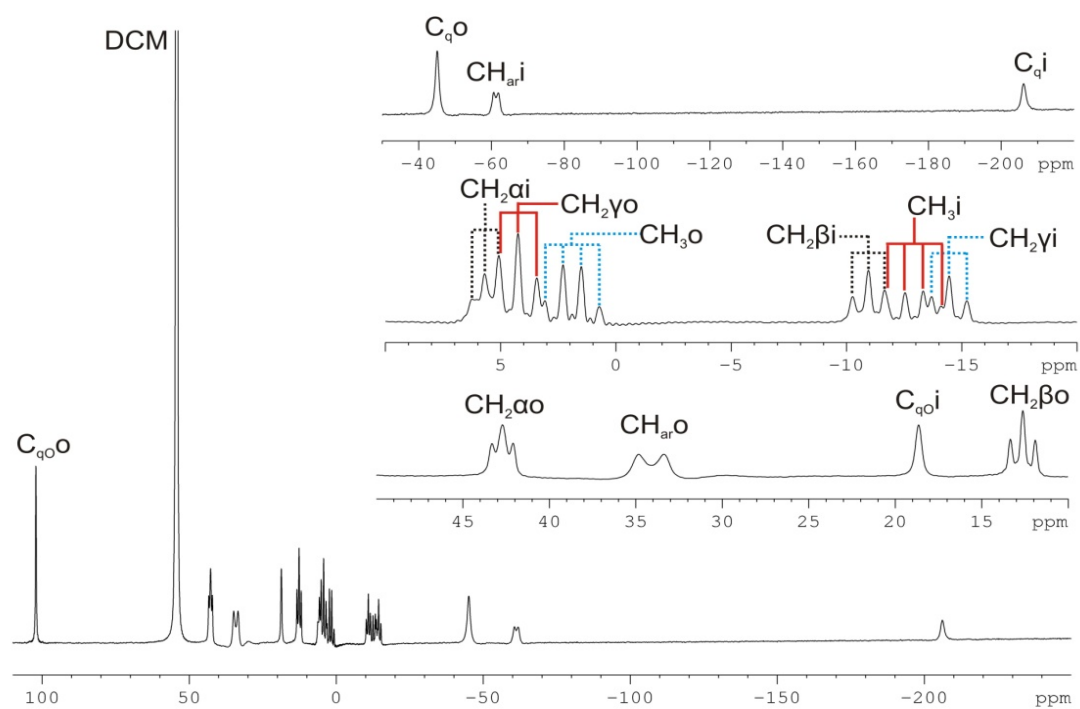

**Figure S13.**  $^{13}\text{C}$  NMR spectrum of **1** dissolved in  $\text{CD}_2\text{Cl}_2$ , with assignments. Spectrum was recorded at 14.09 T, at a temperature of at 315.0 K.

## II. The model for fitting the $^{13}\text{C}$ NMR pseudocontact shifts (Fig. S14-S18, Table S1-S15)

|                                 |                  | $T$ [K]                                     |         |         |         |         |         |
|---------------------------------|------------------|---------------------------------------------|---------|---------|---------|---------|---------|
|                                 |                  | 265.0                                       | 275.0   | 285.0   | 295.0   | 305.0   | 315.0   |
| Group:                          | Comments:        | $^1\text{H}$ NMR Data: $\delta_{obs}$ [ppm] |         |         |         |         |         |
| $\text{CH}_2\alpha\text{i}$     |                  | -95.93                                      | -88.33  | -81.39  | -75.17  | -69.58  | -64.51  |
| $\text{CH}_2\beta\text{i}$      |                  | -54.38                                      | -50.40  | -46.70  | -43.43  | -40.50  | -37.82  |
| $\text{CH}_2\gamma\text{i}$     |                  | -47.99                                      | -44.33  | -41.00  | -38.02  | -35.36  | -32.92  |
| $\text{CH}_3\text{i}$           |                  | -35.16                                      | -32.73  | -30.49  | -28.47  | -26.64  | -24.93  |
| $\text{CH}_{\text{ar}}\text{i}$ |                  | -210.86                                     | -194.94 | -180.25 | -167.19 | -155.53 | -144.97 |
| $\text{CH}_2\alpha\text{o}$     | 1st $^1\text{H}$ | -24.05                                      | -21.93  | -20.04  | -18.39  | -16.96  | -15.66  |
|                                 | 2nd $^1\text{H}$ | -53.68                                      | -48.55  | -43.93  | -39.87  | -36.31  | -33.17  |
| $\text{CH}_2\beta\text{o}$      | 1st $^1\text{H}$ | -25.36                                      | -23.25  | -21.32  | -19.60  | -18.10  | -16.74  |
|                                 | 2nd $^1\text{H}$ | -26.83                                      | -24.46  | -22.31  | -20.40  | -18.76  | -17.29  |
| $\text{CH}_2\gamma\text{o}$     | 1st $^1\text{H}$ | -22.16                                      | -20.11  | -18.34  | -16.82  | -15.50  | -14.28  |
|                                 | 2nd $^1\text{H}$ | -22.16                                      | -20.28  | -18.56  | -17.07  | -15.76  | -14.58  |
| $\text{CH}_3\text{o}$           |                  | -16.40                                      | -15.01  | -13.78  | -12.72  | -11.80  | -10.96  |
| $\text{CH}_{\text{ar}}\text{o}$ |                  | -73.54                                      | -67.44  | -61.85  | -56.90  | -52.47  | -48.44  |

**Table S1.** Observed  $^1\text{H}$  NMR chemical shifts of the terbium triple decker **1** at different temperatures.

| Group:                          | $T$ [K]                                        |        |        |        |        |        |
|---------------------------------|------------------------------------------------|--------|--------|--------|--------|--------|
|                                 | 265.0                                          | 275.0  | 285.0  | 295.0  | 305.0  | 315.0  |
|                                 | $^{13}\text{C}$ NMR Data: $\delta_{obs}$ [ppm] |        |        |        |        |        |
| $\text{CH}_2\alpha\text{i}$     | -23.0                                          | -16.1  | -9.8   | -4.1   | 1.1    | 5.7    |
| $\text{CH}_2\beta\text{i}$      | -29.5                                          | -25.2  | -21.1  | -17.4  | -14.0  | -11.0  |
| $\text{CH}_2\gamma\text{i}$     | -29.8                                          | -25.9  | -22.6  | -19.6  | -16.9  | -14.5  |
| $\text{CH}_3\text{i}$           | -24.1                                          | -21.4  | -19.0  | -16.7  | -14.7  | -13.0  |
| $\text{C}_{\text{q}}\text{i}$   | -341.0                                         | -308.0 | -278.8 | -252.1 | -228.1 | -206.1 |
| $\text{CH}_{\text{ar}}\text{i}$ | -135.4                                         | -117.2 | -101.1 | -86.5  | -73.2  | -61.2  |
| $\text{C}_{\text{qO}}\text{i}$  | -38.3                                          | -24.6  | -12.1  | -0.8   | 9.4    | 18.6   |
| $\text{CH}_2\alpha\text{o}$     | 28.5                                           | 32.0   | 35.1   | 37.9   | 40.4   | 42.7   |
| $\text{CH}_2\beta\text{o}$      | 2.6                                            | 5.1    | 7.3    | 9.3    | 11.0   | 12.6   |
| $\text{CH}_2\gamma\text{o}$     | -3.6                                           | -1.6   | 0.1    | 1.7    | 3.0    | 4.2    |
| $\text{CH}_3\text{o}$           | -4.0                                           | -2.5   | -1.1   | 0.0    | 1.0    | 1.9    |
| $\text{C}_{\text{q}}\text{o}$   | -97.7                                          | -85.0  | -73.7  | -63.3  | -53.8  | -45.1  |
| $\text{CH}_{\text{ar}}\text{o}$ | 5.1                                            | 11.4   | 17.9   | 23.8   | 29.2   | 34.1   |
| $\text{C}_{\text{qO}}\text{o}$  | 80.6                                           | 85.8   | 90.6   | 94.8   | 98.6   | 102.1  |

**Table S2.** Observed  $^{13}\text{C}$  NMR chemical shifts of the terbium triple decker **1** at different temperatures.

| Group:                     | <sup>13</sup> C NMR  | <sup>1</sup> H NMR |
|----------------------------|----------------------|--------------------|
|                            | $\delta_{orb}$ [ppm] |                    |
| CH <sub>2</sub> $\alpha$ i | 68.7                 | 4.06               |
| CH <sub>2</sub> $\beta$ i  | 31.8                 | 1.76               |
| CH <sub>2</sub> $\gamma$ i | 19.0                 | 1.45               |
| CH <sub>3</sub> i          | 14.1                 | 0.90               |
| C <sub>q</sub> i           | 113.8                | /                  |
| CH <sub>ar</sub> i         | 113.5                | 7.50               |
| C <sub>qO</sub> i          | 150.3                | /                  |
| CH <sub>2</sub> $\alpha$ o | 68.7                 | 4.06               |
| CH <sub>2</sub> $\beta$ o  | 31.8                 | 1.76               |
| CH <sub>2</sub> $\gamma$ o | 19.0                 | 1.45               |
| CH <sub>3</sub> o          | 14.1                 | 0.90               |
| C <sub>q</sub> o           | 113.8                | /                  |
| CH <sub>ar</sub> o         | 113.5                | 7.50               |
| C <sub>qO</sub> o          | 150.3                | /                  |

**Table S3.** Calculated orbital (diamagnetic) contributions to the overall <sup>13</sup>C and <sup>1</sup>H NMR chemical shifts. Calculations were done for the phthalocyaninato ligand of complex **1** based on increments, using ChemDraw 12.<sup>i</sup>

| Group:                     | $T$ [K]                                                            |       |       |       |       |       |
|----------------------------|--------------------------------------------------------------------|-------|-------|-------|-------|-------|
|                            | 265.0                                                              | 275.0 | 285.0 | 295.0 | 305.0 | 315.0 |
|                            | $\delta_{pc}$ (experimental) [ppm] = $\delta_{obs} - \delta_{orb}$ |       |       |       |       |       |
| CH <sub>2</sub> $\alpha$ i | -91.7                                                              | -84.8 | -78.5 | -72.8 | -67.6 | -63.0 |
| CH <sub>2</sub> $\beta$ i  | -61.3                                                              | -57.0 | -52.9 | -49.2 | -45.8 | -42.8 |
| CH <sub>2</sub> $\gamma$ i | -48.8                                                              | -44.9 | -41.6 | -38.6 | -35.9 | -33.5 |

**Table S4.** Experimental values of the <sup>13</sup>C NMR pseudocontact shifts for the groups that were used in the calculation of the magnetic susceptibility anisotropy (obtained as the difference between the observed chemical shift and the calculated orbital contribution to the observed chemical shift).

| Group:             | $r_{prox}$ [Å] | $\theta_{prox}$ [°] | $r_{dist}$ [Å] | $\theta_{dist}$ [°] | $G_{prox} + G_{dist}$ [m <sup>-3</sup> ] | $\delta_{pc}$ [ppm] | $\chi_a$ [m <sup>3</sup> ] |
|--------------------|----------------|---------------------|----------------|---------------------|------------------------------------------|---------------------|----------------------------|
| CH <sub>2</sub> αi | 8.2519         | 94.65               | 8.7042         | 70.88               | -2.773E+27                               | -72.8               | 9.90E-31                   |
|                    | 8.4394         | 100.22              | 8.5473         | 76.34               | -2.840E+27                               |                     | 9.66E-31                   |
|                    | 8.7229         | 110.67              | 8.1733         | 86.93               | -2.759E+27                               |                     | 9.95E-31                   |
|                    | 8.6318         | 108.08              | 8.2481         | 84.17               | -2.833E+27                               |                     | 9.69E-31                   |
| CH <sub>2</sub> βi | 10.1338        | 107.06              | 9.7032         | 86.79               | -1.797E+27                               | -49.2               | 1.032E-30                  |
|                    | 10.2277        | 111.74              | 9.5042         | 91.64               | -1.712E+27                               |                     | 1.083E-30                  |
|                    | 9.9418         | 99.26               | 10.0002        | 78.91               | -1.828E+27                               |                     | 1.015E-30                  |
|                    | 9.6262         | 90.90               | 10.1962        | 70.73               | -1.755E+27                               |                     | 1.057E-30                  |
| CH <sub>2</sub> γi | 10.9167        | 106.50              | 10.4754        | 87.73               | -1.448E+27                               | -38.6               | 1.005E-30                  |
|                    | 11.0184        | 105.51              | 10.6323        | 86.93               | -1.412E+27                               |                     | 1.031E-30                  |
|                    | 10.7536        | 99.20               | 10.7665        | 80.39               | -1.477E+27                               |                     | 9.85E-31                   |
|                    | 9.7179         | 82.83               | 10.7392        | 63.87               | -1.376E+27                               |                     | 1.057E-30                  |
| Average            |                |                     |                |                     |                                          |                     | 1.015E-30                  |
| Standard Deviation |                |                     |                |                     |                                          |                     | 3.7E-32                    |

**Table S5.** X- ray data coordinates of the carbon atoms of the methylene groups that were used to calculate the magnetic susceptibility anisotropy of complex **1**. The table also contains the sum of the geometric factors calculated with these coordinates for both terbium centers (with equation 8 from the main text), the calculated magnetic susceptibility anisotropy for each atom in the asymmetric unit of **1**, as well as the average value of  $\chi_a$  and its standard deviation. The values of  $\delta_{pc}$  used in the calculation of  $\chi_a$  are taken from Table S4. The asymmetric unit of complex **1** is given in Figure S31.

| Group:                     | $T$ [K]                    |           |           |           |          |          |
|----------------------------|----------------------------|-----------|-----------|-----------|----------|----------|
|                            | 265.0                      | 275.0     | 285.0     | 295.0     | 305.0    | 315.0    |
|                            | $\chi_a$ [m <sup>3</sup> ] |           |           |           |          |          |
| CH <sub>2</sub> $\alpha$ i | 1.247E-30                  | 1.152E-30 | 1.067E-30 | 9.90E-31  | 9.19E-31 | 8.57E-31 |
|                            | 1.217E-30                  | 1.125E-30 | 1.042E-30 | 9.66E-31  | 8.97E-31 | 8.36E-31 |
|                            | 1.253E-30                  | 1.158E-30 | 1.072E-30 | 9.95E-31  | 9.24E-31 | 8.61E-31 |
|                            | 1.220E-30                  | 1.128E-30 | 1.045E-30 | 9.69E-31  | 9.00E-31 | 8.38E-31 |
| CH <sub>2</sub> $\beta$ i  | 1.286E-30                  | 1.196E-30 | 1.110E-30 | 1.032E-30 | 9.61E-31 | 8.97E-31 |
|                            | 1.350E-30                  | 1.255E-30 | 1.165E-30 | 1.083E-30 | 1.01E-30 | 9.41E-31 |
|                            | 1.265E-30                  | 1.176E-30 | 1.091E-30 | 1.015E-30 | 9.45E-31 | 8.82E-31 |
|                            | 1.316E-30                  | 1.224E-30 | 1.136E-30 | 1.057E-30 | 9.84E-31 | 9.18E-31 |
| CH <sub>2</sub> $\gamma$ i | 1.270E-30                  | 1.169E-30 | 1.083E-30 | 1.005E-30 | 9.34E-31 | 8.72E-31 |
|                            | 1.303E-30                  | 1.199E-30 | 1.111E-30 | 1.031E-30 | 9.59E-31 | 8.94E-31 |
|                            | 1.246E-30                  | 1.146E-30 | 1.062E-30 | 9.85E-31  | 9.16E-31 | 8.55E-31 |
|                            | 1.337E-30                  | 1.230E-30 | 1.139E-30 | 1.057E-30 | 9.83E-31 | 9.18E-31 |
| Average                    |                            |           |           |           |          |          |
|                            | 1.276E-30                  | 1.180E-30 | 1.094E-30 | 1.015E-30 | 9.44E-31 | 8.81E-31 |
| Standard Deviation         |                            |           |           |           |          |          |
|                            | 4.3E-32                    | 4.2E-32   | 3.9E-32   | 3.7E-32   | 3.5E-32  | 3.4E-32  |

**Table S6.** Using the coordinates from Table S5, with the experimental pseudocontact shifts given in Table S4, magnetic susceptibility anisotropy values were calculated for all temperatures at which the <sup>13</sup>C and <sup>1</sup>H NMR spectra were recorded. The calculated  $\chi_a$  values from each carbon atom in the asymmetric unit of **1**, along with the average values and standard deviations of  $\chi_a$  for each temperature, are reported in this table. The  $\chi_a$  values are summarized in Table S7.

| $T$ [K] | $\chi_a$ [m <sup>3</sup> ] | Standard Deviation of $\chi_a$ [m <sup>3</sup> ] |
|---------|----------------------------|--------------------------------------------------|
| 265.0   | 12.76E-31                  | 0.43E-31                                         |
| 275.0   | 11.80E-31                  | 0.42E-31                                         |
| 285.0   | 10.94E-31                  | 0.39E-31                                         |
| 295.0   | 10.15E-31                  | 0.37E-31                                         |
| 305.0   | 9.44E-31                   | 0.35E-31                                         |
| 315.0   | 8.81E-31                   | 0.34E-31                                         |

**Table S7.**  $\chi_a$  values calculated at different temperatures from the pseudocontact shifts of the CH<sub>2</sub> $\alpha$ i, CH<sub>2</sub> $\beta$ i and CH<sub>2</sub> $\gamma$ i carbon atoms of **1** as described in the main text, with standard deviations.

| Bond                                | Bond Length [Å] | Angle                                                 | Angle Value [°] |
|-------------------------------------|-----------------|-------------------------------------------------------|-----------------|
| O-CH <sub>2</sub> α                 | 1.430           | C <sub>qO</sub> -O-CH <sub>2</sub> α                  | 117.50          |
| CH <sub>2</sub> α-CH <sub>2</sub> β | 1.517           | O-CH <sub>2</sub> α-CH <sub>2</sub> β                 | 106.50          |
| CH <sub>2</sub> β-CH <sub>2</sub> γ | 1.526           | CH <sub>2</sub> α-CH <sub>2</sub> β-CH <sub>2</sub> γ | 113.30          |
| CH <sub>2</sub> γ-CH <sub>3</sub>   | 1.528           | CH <sub>2</sub> β-CH <sub>2</sub> γ-CH <sub>3</sub>   | 112.90          |

**Table S8.** Bond lengths and angles used in the model made to fit the pseudocontact contributions to the overall chemical shifts of the <sup>13</sup>C NMR resonances. These values were taken as average values of the corresponding bond lengths and angles measured from the crystal structure of **1** and are applied to the modeled butoxy chains of both the inner and outer phthalocyaninato ligand.

| Dihedral angle $\varphi$                                              | $\varphi$ [°] |              |
|-----------------------------------------------------------------------|---------------|--------------|
|                                                                       | Inner Ligand  | Outer Ligand |
| CH <sub>ar</sub> -C <sub>qO</sub> -O-CH <sub>2</sub> α                | 0.0           | 23.8         |
| C <sub>qO</sub> -O-CH <sub>2</sub> α-CH <sub>2</sub> β                | 180.0         | 171.4        |
| O-CH <sub>2</sub> α-CH <sub>2</sub> β-CH <sub>2</sub> γ               | 180.0         | 177.1        |
| CH <sub>2</sub> α-CH <sub>2</sub> β-CH <sub>2</sub> γ-CH <sub>3</sub> | 180.0         | -172.2       |

**Table S9.** Dihedral angles describing the butoxy groups of the modeled inner and outer phthalocyaninato ligands.

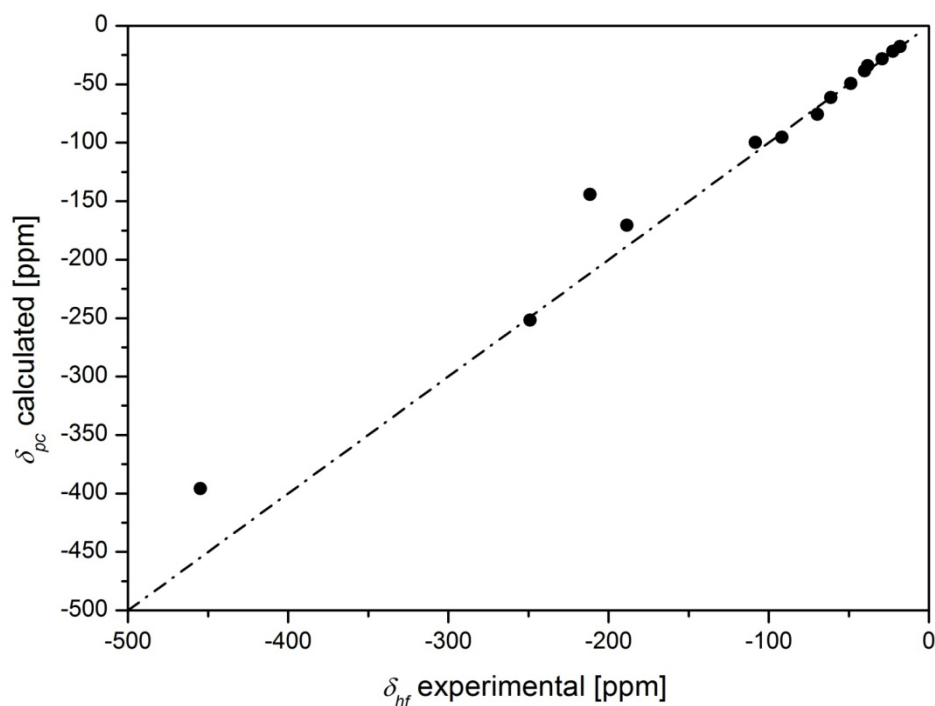

**Figure S14.** Calculated vs. experimental pseudocontact contributions to the overall chemical shift of the  $^{13}\text{C}$  NMR resonances of **1** dissolved in deuterated dichloromethane at 265.0 K. The dash-dot line represents the  $\delta_{pc}(\text{calculated}) = \delta_{hf}(\text{experimental})$  line.

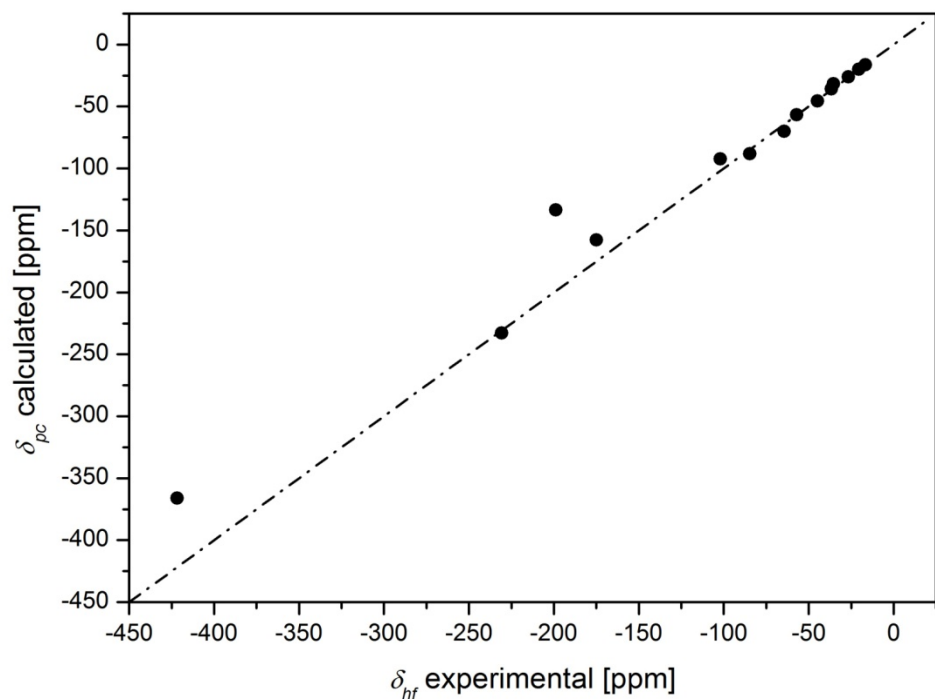

**Figure S15.** Calculated vs. experimental pseudocontact contributions to the overall chemical shift of the  $^{13}\text{C}$  NMR resonances of **1** dissolved in deuterated dichloromethane at 275.0 K. The dash-dot line represents the  $\delta_{pc}(\text{calculated}) = \delta_{hf}(\text{experimental})$  line.

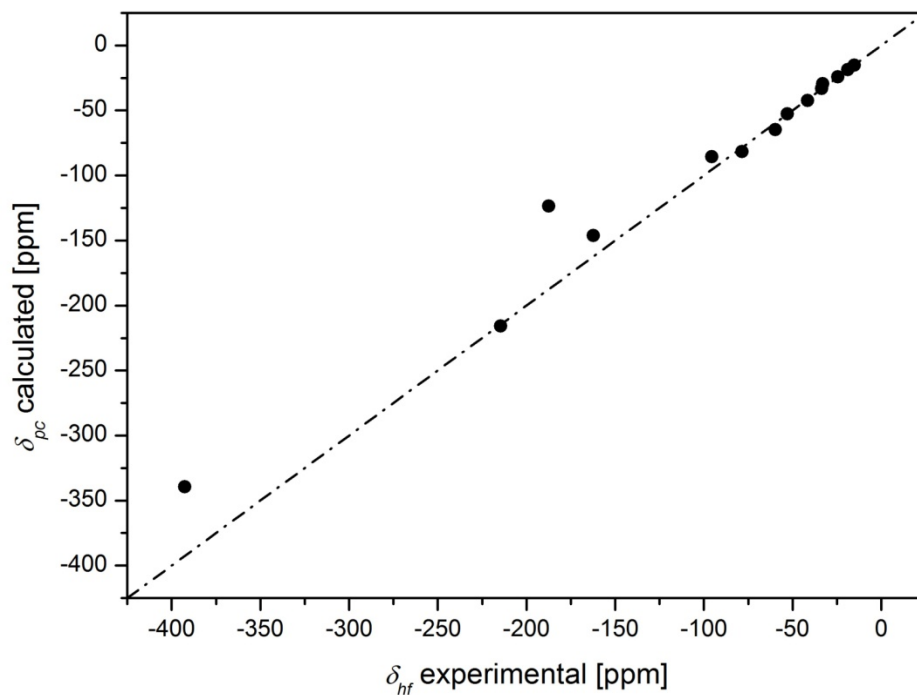

**Figure S16.** Calculated vs. experimental pseudocontact contributions to the overall chemical shift of the  $^{13}\text{C}$  NMR resonances of **1** dissolved in deuterated dichloromethane at 285.0 K. The dash-dot line represents the  $\delta_{pc}(\text{calculated}) = \delta_{hf}(\text{experimental})$  line.

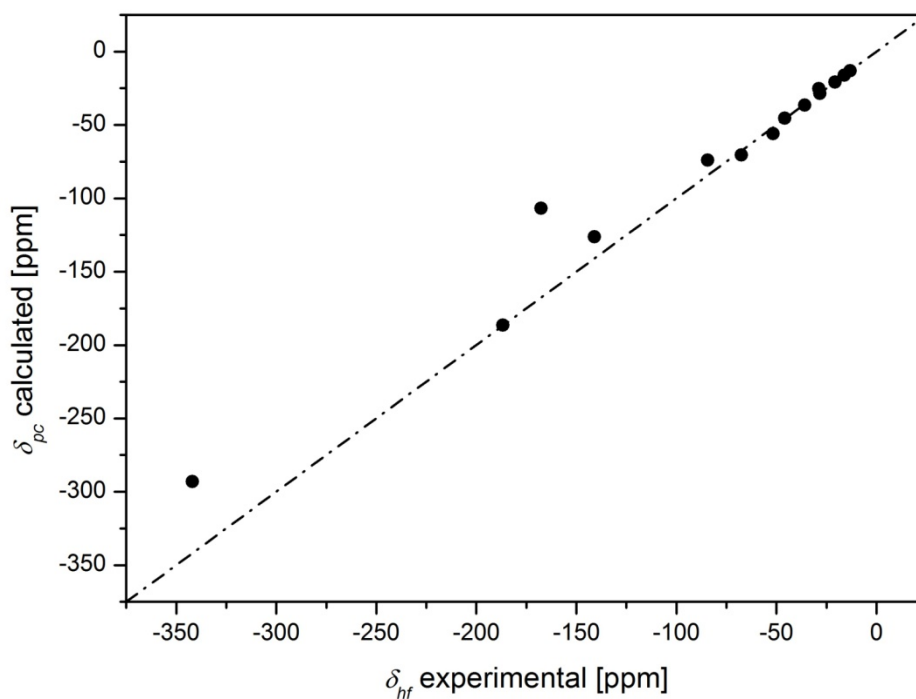

**Figure S17.** Calculated vs. experimental pseudocontact contributions to the overall chemical shift of the  $^{13}\text{C}$  NMR resonances of **1** dissolved in deuterated dichloromethane at 305.0 K. The dash-dot line represents the  $\delta_{pc}(\text{calculated}) = \delta_{hf}(\text{experimental})$  line.



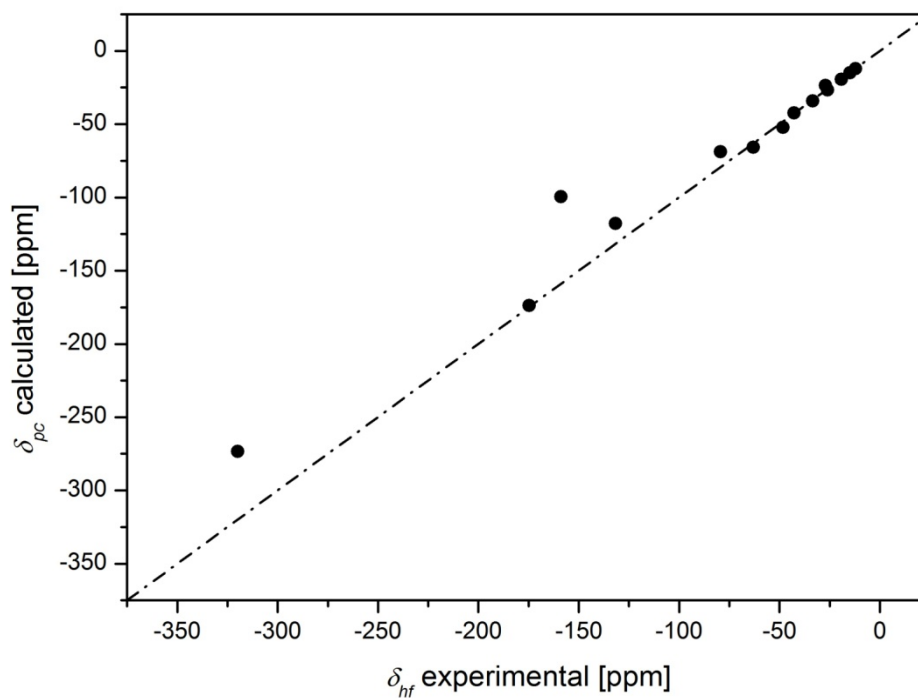

**Figure S18.** Calculated vs. experimental pseudocontact contributions to the overall chemical shift of the  $^{13}\text{C}$  NMR resonances of **1** dissolved in deuterated dichloromethane at 315.0 K. The dash-dot line represents the  $\delta_{pc}(\text{calculated}) = \delta_{hf}(\text{experimental})$  line.

| Group:                | $r_{prox} [\text{\AA}]$ | $\theta_{prox} [^\circ]$ | $r_{dist} [\text{\AA}]$ | $\theta_{dist} [^\circ]$ |
|-----------------------|-------------------------|--------------------------|-------------------------|--------------------------|
| $\text{CH}_2\alpha_i$ | 8.5242                  | 101.90                   | 8.5242                  | 78.10                    |
| $\text{CH}_2\beta_i$  | 10.0068                 | 100.11                   | 10.0068                 | 79.89                    |
| $\text{CH}_2\gamma_i$ | 10.8030                 | 99.37                    | 10.8030                 | 80.63                    |
| $\text{CH}_3i$        | 12.2812                 | 98.23                    | 12.2812                 | 81.77                    |
| $\text{C}_qi$         | 4.5561                  | 112.70                   | 4.5561                  | 67.30                    |
| $\text{CH}_{ar}i$     | 5.7945                  | 107.66                   | 5.7945                  | 72.34                    |
| $\text{C}_{qO}i$      | 6.8255                  | 104.93                   | 6.8255                  | 75.07                    |
| $\text{CH}_2\alpha_o$ | 8.6244                  | 73.35                    | 10.2042                 | 54.07                    |
| $\text{CH}_2\beta_o$  | 10.1208                 | 74.36                    | 11.5760                 | 57.34                    |
| $\text{CH}_2\gamma_o$ | 10.9806                 | 73.36                    | 12.4520                 | 57.66                    |
| $\text{CH}_3o$        | 12.4400                 | 75.00                    | 13.7753                 | 60.73                    |

**Table S10.** Coordinates of the modeled  $^{13}\text{C}$  nuclei of the inner and outer phthalocyaninato ligands.

| Group:                     | Comments:         | <i>T</i> [K]                 |                                             |                              |                                             |                              |                                             |
|----------------------------|-------------------|------------------------------|---------------------------------------------|------------------------------|---------------------------------------------|------------------------------|---------------------------------------------|
|                            |                   | 265.0                        |                                             | 275.0                        |                                             | 285.0                        |                                             |
|                            |                   | $\delta_{pc}$ calc.<br>[ppm] | $\delta_{hf}$ exptl. <sup>a)</sup><br>[ppm] | $\delta_{pc}$ calc.<br>[ppm] | $\delta_{hf}$ exptl. <sup>a)</sup><br>[ppm] | $\delta_{pc}$ calc.<br>[ppm] | $\delta_{hf}$ exptl. <sup>a)</sup><br>[ppm] |
| CH <sub>2</sub> $\alpha$ i |                   | -95.3                        | -91.7                                       | -88.2                        | -84.8                                       | -81.7                        | -78.5                                       |
| CH <sub>2</sub> $\beta$ i  |                   | -61.3                        | -61.3                                       | -56.7                        | -57.0                                       | -52.5                        | -52.9                                       |
| CH <sub>2</sub> $\gamma$ i |                   | -49.4                        | -48.8                                       | -45.7                        | -44.9                                       | -42.4                        | -41.6                                       |
| CH <sub>3</sub> i          |                   | -34.3                        | -38.2                                       | -31.7                        | -35.5                                       | -29.4                        | -33.1                                       |
| C <sub>q</sub> Oi          |                   | -170.5                       | -188.6                                      | -157.6                       | -174.9                                      | -146.1                       | -162.3                                      |
| CH <sub>ar</sub> i         |                   | -251.8                       | -248.9                                      | -232.8                       | -230.7                                      | -215.8                       | -214.6                                      |
| C <sub>q</sub> i           |                   | -395.9                       | -454.8                                      | -366.1                       | -421.8                                      | -339.4                       | -392.6                                      |
| CH <sub>2</sub> $\alpha$ o |                   | -38.7                        | -40.2                                       | -35.8                        | -36.7                                       | -33.2                        | -33.6                                       |
| CH <sub>2</sub> $\beta$ o  |                   | -28.3                        | -29.2                                       | -26.1                        | -26.7                                       | -24.2                        | -24.5                                       |
| CH <sub>2</sub> $\gamma$ o |                   | -21.8                        | -22.6                                       | -20.1                        | -20.6                                       | -18.6                        | -18.9                                       |
| CH <sub>3</sub> o          |                   | -17.7                        | -18.1                                       | -16.4                        | -16.6                                       | -15.2                        | -15.2                                       |
| C <sub>q</sub> Oo          | XRD <sup>b)</sup> | -75.7                        | -69.7                                       | -70.0                        | -64.5                                       | -64.9                        | -59.7                                       |
| CH <sub>ar</sub> o         | XRD <sup>b)</sup> | -99.9                        | -108.4                                      | -92.4                        | -102.1                                      | -85.6                        | -95.6                                       |
| C <sub>q</sub> O           | XRD <sup>b)</sup> | -144.2                       | -211.5                                      | -133.4                       | -198.8                                      | -123.6                       | -187.5                                      |

**Table S11.** Calculated *pcs* from model ( $\delta_{pc}$  calc.) vs. experimental hyperfine contributions to the overall observed chemical shifts in ( $\delta_{hf}$  exptl.) <sup>13</sup>C NMR spectra of **1** dissolved in CD<sub>2</sub>Cl<sub>2</sub> at temperatures 265.0 K – 285.0 K. a) The values of the experimental hyperfine shifts mentioned here correspond to the differences between the observed chemical shifts and the diamagnetic contributions to these chemical shifts. b) The pseudocontact shift for the indicated group was calculated as the average value of the pseudocontact shifts of the eight individual carbon atoms of this group (see asymmetric unit, Figure S31).

| Group:                     | Comments:         | <i>T</i> [K]                 |                                             |                              |                                             |                              |                                             |
|----------------------------|-------------------|------------------------------|---------------------------------------------|------------------------------|---------------------------------------------|------------------------------|---------------------------------------------|
|                            |                   | 295.0                        |                                             | 305.0                        |                                             | 315.0                        |                                             |
|                            |                   | $\delta_{pc}$ calc.<br>[ppm] | $\delta_{hf}$ exptl. <sup>a)</sup><br>[ppm] | $\delta_{pc}$ calc.<br>[ppm] | $\delta_{hf}$ exptl. <sup>a)</sup><br>[ppm] | $\delta_{pc}$ calc.<br>[ppm] | $\delta_{hf}$ exptl. <sup>a)</sup><br>[ppm] |
| CH <sub>2</sub> $\alpha$ i |                   | -75.9                        | -72.8                                       | -70.6                        | -67.6                                       | -65.8                        | -63.0                                       |
| CH <sub>2</sub> $\beta$ i  |                   | -48.8                        | -49.2                                       | -45.4                        | -45.8                                       | -42.3                        | -42.8                                       |
| CH <sub>2</sub> $\gamma$ i |                   | -39.3                        | -38.6                                       | -36.6                        | -35.9                                       | -34.1                        | -33.5                                       |
| CH <sub>3</sub> i          |                   | -27.3                        | -30.8                                       | -25.4                        | -28.8                                       | -23.7                        | -27.1                                       |
| C <sub>q</sub> Oi          |                   | -135.7                       | -151.1                                      | -126.2                       | -140.9                                      | -117.7                       | -131.7                                      |
| CH <sub>ar</sub> i         |                   | -200.4                       | -200.0                                      | -186.3                       | -186.7                                      | -173.8                       | -174.7                                      |
| C <sub>q</sub> i           |                   | -315.1                       | -365.9                                      | -293.0                       | -341.9                                      | -273.3                       | -319.9                                      |
| CH <sub>2</sub> $\alpha$ o |                   | -30.8                        | -30.8                                       | -28.6                        | -28.3                                       | -26.7                        | -26.0                                       |
| CH <sub>2</sub> $\beta$ o  |                   | -22.5                        | -22.5                                       | -20.9                        | -20.8                                       | -19.5                        | -19.2                                       |
| CH <sub>2</sub> $\gamma$ o |                   | -17.3                        | -17.3                                       | -16.1                        | -16.0                                       | -15.0                        | -14.8                                       |
| CH <sub>3</sub> o          |                   | -14.1                        | -14.1                                       | -13.1                        | -13.1                                       | -12.2                        | -12.2                                       |
| C <sub>q</sub> Oo          | XRD <sup>b)</sup> | -60.3                        | -55.5                                       | -56.0                        | -51.7                                       | -52.3                        | -48.2                                       |
| CH <sub>ar</sub> o         | XRD <sup>b)</sup> | -79.5                        | -89.7                                       | -73.9                        | -84.3                                       | -69.0                        | -79.4                                       |
| C <sub>q</sub> o           | XRD <sup>b)</sup> | -114.8                       | -177.1                                      | -106.8                       | -167.6                                      | -99.6                        | -158.9                                      |

**Table S12.** Calculated *pcs* from model ( $\delta_{pc}$  calc.) vs. experimental hyperfine contributions to the overall observed chemical shifts ( $\delta_{hf}$  exptl.) in <sup>13</sup>C NMR spectra of **1** dissolved in CD<sub>2</sub>Cl<sub>2</sub> at temperatures 295.0 K – 315.0 K. a) The values of the experimental hyperfine shifts mentioned here correspond to the differences between the observed chemical shifts and the orbital contributions to these chemical shifts. b) The pseudocontact shift for the indicated group was calculated as the average value of the pseudocontact shifts of the eight individual carbon atoms of this group (see asymmetric unit, Figure S31).

| C <sub>q</sub> O |                |                     |                |                     |
|------------------|----------------|---------------------|----------------|---------------------|
| Atom:            | $r_{prox}$ [Å] | $\theta_{prox}$ [°] | $r_{dist}$ [Å] | $\theta_{dist}$ [°] |
| 1                | 4.4457         | 73.91               | 6.3869         | 41.98               |
| 2                | 4.4366         | 74.69               | 6.3463         | 42.39               |
| 3                | 4.5195         | 67.61               | 6.7006         | 38.58               |
| 4                | 4.4986         | 69.07               | 6.6262         | 39.35               |
| 5                | 4.5654         | 65.59               | 6.8172         | 37.58               |
| 6                | 4.5627         | 65.35               | 6.8241         | 37.34               |
| 7                | 4.4824         | 71.56               | 6.5136         | 40.76               |
| 8                | 4.5249         | 69.57               | 6.6295         | 39.76               |

  

| CH <sub>ar</sub> O |                |                     |                |                     |
|--------------------|----------------|---------------------|----------------|---------------------|
| Atom:              | $r_{prox}$ [Å] | $\theta_{prox}$ [°] | $r_{dist}$ [Å] | $\theta_{dist}$ [°] |
| 1                  | 5.7887         | 72.85               | 7.6076         | 46.64               |
| 2                  | 5.8020         | 70.65               | 7.7168         | 45.19               |
| 3                  | 5.8635         | 68.14               | 7.8802         | 43.68               |
| 4                  | 5.8479         | 68.63               | 7.8455         | 43.96               |
| 5                  | 5.8239         | 72.25               | 7.6661         | 46.35               |
| 6                  | 5.7477         | 75.94               | 7.4311         | 48.62               |
| 7                  | 5.6676         | 79.81               | 7.1791         | 50.99               |
| 8                  | 5.7221         | 78.10               | 7.3080         | 50.01               |

  

| C <sub>q</sub> O <sub>2</sub> |                |                     |                |                     |
|-------------------------------|----------------|---------------------|----------------|---------------------|
| Atom:                         | $r_{prox}$ [Å] | $\theta_{prox}$ [°] | $r_{dist}$ [Å] | $\theta_{dist}$ [°] |
| 1                             | 6.8167         | 72.88               | 8.5406         | 49.71               |
| 2                             | 6.8128         | 73.76               | 8.4960         | 50.34               |
| 3                             | 6.8880         | 69.46               | 8.7638         | 47.39               |
| 4                             | 6.8928         | 69.27               | 8.7770         | 47.26               |
| 5                             | 6.7887         | 76.72               | 8.3320         | 52.46               |
| 6                             | 6.8334         | 75.00               | 8.4555         | 51.32               |
| 7                             | 6.7081         | 81.25               | 8.0339         | 55.62               |
| 8                             | 6.6747         | 82.17               | 7.9566         | 56.21               |

**Table S13.** Coordinates of the C<sub>q</sub>O, CH<sub>ar</sub>O and C<sub>q</sub>O<sub>2</sub> carbon atoms, as taken from the asymmetric unit of complex **1** (Figure S31).

|                    | <i>T</i> [K]                               |        |        |        |        |        |
|--------------------|--------------------------------------------|--------|--------|--------|--------|--------|
|                    | 265.0                                      | 275.0  | 285.0  | 295.0  | 305.0  | 315.0  |
| Atom:              | $C_{qO}: \delta_{pc}$ (calculated) [ppm]   |        |        |        |        |        |
| 1                  | -211.0                                     | -195.1 | -180.8 | -167.9 | -156.1 | -145.6 |
| 2                  | -222.2                                     | -205.5 | -190.5 | -176.9 | -164.5 | -153.4 |
| 3                  | -113.3                                     | -104.8 | -97.1  | -90.2  | -83.8  | -78.2  |
| 4                  | -137.0                                     | -126.7 | -117.5 | -109.1 | -101.4 | -94.6  |
| 5                  | -79.0                                      | -73.1  | -67.7  | -62.9  | -58.5  | -54.5  |
| 6                  | -74.9                                      | -69.2  | -64.2  | -59.6  | -55.4  | -51.7  |
| 7                  | -174.7                                     | -161.5 | -149.7 | -139.0 | -129.3 | -120.6 |
| 8                  | -141.9                                     | -131.3 | -121.7 | -113.0 | -105.0 | -98.0  |
| Average            | -144.2                                     | -133.4 | -123.6 | -114.8 | -106.8 | -99.6  |
| Standard Deviation | 55.5                                       | 51.3   | 47.6   | 44.2   | 41.1   | 38.3   |
| Atom:              | $CH_{arO}: \delta_{pc}$ (calculated) [ppm] |        |        |        |        |        |
| 1                  | -97.2                                      | -89.8  | -83.3  | -77.3  | -71.9  | -67.1  |
| 2                  | -80.1                                      | -74.1  | -68.7  | -63.7  | -59.3  | -55.3  |
| 3                  | -58.7                                      | -54.3  | -50.3  | -46.7  | -43.4  | -40.5  |
| 4                  | -62.9                                      | -58.2  | -53.9  | -50.1  | -46.6  | -43.4  |
| 5                  | -91.3                                      | -84.4  | -78.3  | -72.7  | -67.6  | -63.0  |
| 6                  | -121.0                                     | -111.9 | -103.7 | -96.3  | -89.6  | -83.5  |
| 7                  | -151.2                                     | -139.8 | -129.6 | -120.3 | -111.9 | -104.4 |
| 8                  | -136.8                                     | -126.5 | -117.3 | -108.9 | -101.3 | -94.5  |
| Average            | -99.9                                      | -92.4  | -85.6  | -79.5  | -73.9  | -69.0  |
| Standard Deviation | 33.8                                       | 31.2   | 28.9   | 29.6   | 25.0   | 23.3   |
| Atom:              | $C_{qOO}: \delta_{pc}$ (calculated) [ppm]  |        |        |        |        |        |
| 1                  | -65.3                                      | -60.3  | -55.9  | -51.9  | -48.3  | -45.1  |
| 2                  | -69.7                                      | -64.4  | -59.7  | -55.4  | -51.6  | -48.1  |
| 3                  | -46.5                                      | -43.0  | -39.8  | -37.0  | -34.4  | -32.1  |
| 4                  | -45.4                                      | -42.0  | -38.9  | -36.1  | -33.6  | -31.3  |
| 5                  | -84.4                                      | -78.0  | -72.3  | -67.2  | -62.5  | -58.3  |
| 6                  | -75.1                                      | -69.5  | -64.4  | -59.8  | -55.6  | -51.9  |
| 7                  | -107.1                                     | -99.1  | -91.8  | -85.3  | -79.3  | -74.0  |
| 8                  | -112.3                                     | -103.9 | -96.3  | -89.4  | -83.1  | -77.5  |
| Average            | -75.7                                      | -70.0  | -64.9  | -60.3  | -56.0  | -52.3  |
| Standard Deviation | 24.9                                       | 23.0   | 21.3   | 19.8   | 18.4   | 17.2   |

**Table S14.** Calculated pseudocontact shift contributions to the hyperfine shift of the  $C_{qO}$ ,  $CH_{arO}$  and  $C_{qOO}$   $^{13}C$  NMR resonances at temperatures 265.0 K – 315.0 K, as calculated with the coordinates from Table S13.  $CD_2Cl_2$  was used as solvent.

|         | $C_{qOo}$           | $CH_{arO}$   | $C_{qO}$     | $C_{qOi}$ | $CH_{arI}$ | $C_{qI}$ |
|---------|---------------------|--------------|--------------|-----------|------------|----------|
| $T$ [K] | $\delta_{fc}$ [ppm] |              |              |           |            |          |
| 265.0   | 6.0 (24.9)          | -8.5 (33.8)  | -67.3 (55.5) | -18.1     | 2.9        | -58.9    |
| 275.0   | 5.5 (23.0)          | -9.7 (31.2)  | -65.4 (51.3) | -17.2     | 2.1        | -55.7    |
| 285.0   | 5.2 (21.3)          | -10.0 (28.9) | -63.9 (47.6) | -16.2     | 1.2        | -53.2    |
| 295.0   | 4.8 (19.8)          | -10.2 (26.9) | -62.3 (44.2) | -15.4     | 0.4        | -50.8    |
| 305.0   | 4.4 (18.4)          | -10.4 (25.0) | -60.9 (41.1) | -14.7     | -0.4       | -48.9    |
| 315.0   | 4.1 (17.2)          | -10.4 (23.3) | -59.3 (38.3) | -14.0     | -0.9       | -46.6    |

**Table S15.** Contributions to the hyperfine shift that can be attributed to the Fermi-contact interaction, obtained from  $^{13}\text{C}$  NMR spectra recorded at different temperatures. These were calculated as the difference between the pseudocontact shifts calculated from the model and the pseudocontact shifts obtained from the experiment. Standard deviations are given in brackets. Since the groups of the inner phthalocyaninato ligand were modeled, no standard deviations could be calculated for these.

### III. $^1\text{H}$ and $^{13}\text{C}$ NMR spectra of complex **1** in toluene- $d^8$ (Fig. S19-S21, Table S16-S17)

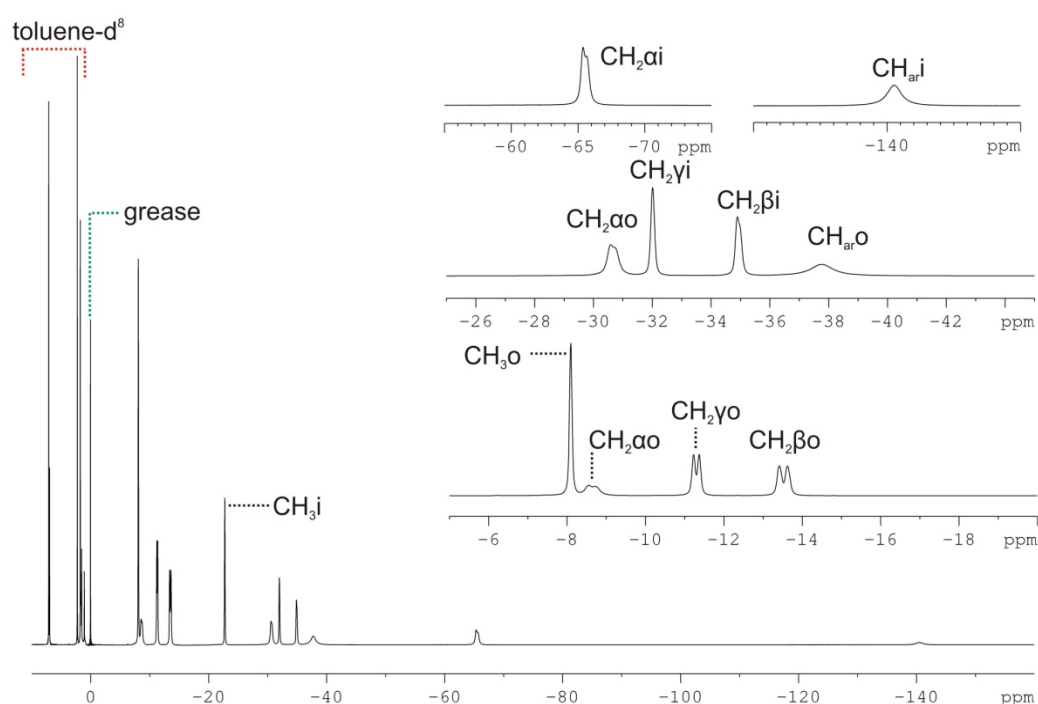

**Figure S19.**  $^1\text{H}$  NMR spectrum of **1** dissolved in toluene- $d^8$ , with assignments. Spectrum was recorded at 14.09 T, at a temperature of 295.0 K.

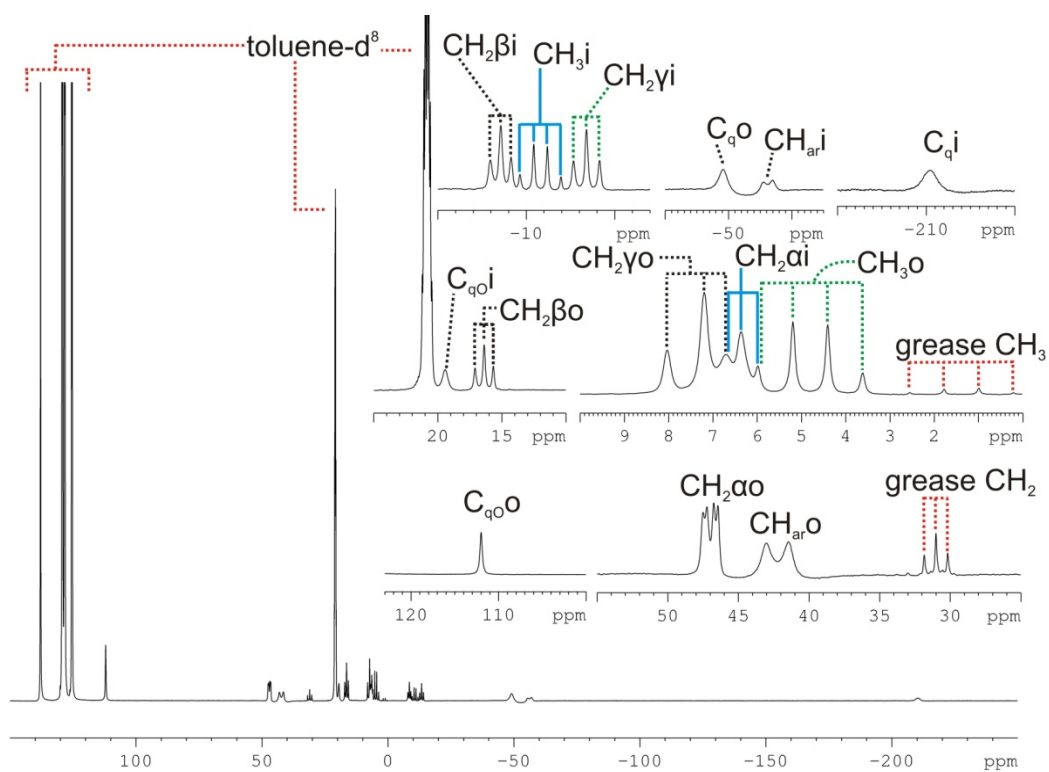

**Figure S20.**  $^{13}\text{C}$  NMR spectrum of **1** dissolved in  $\text{toluene-d}^8$ , with assignments. Spectrum was recorded at 14.09 T, at a temperature of 295.0 K.

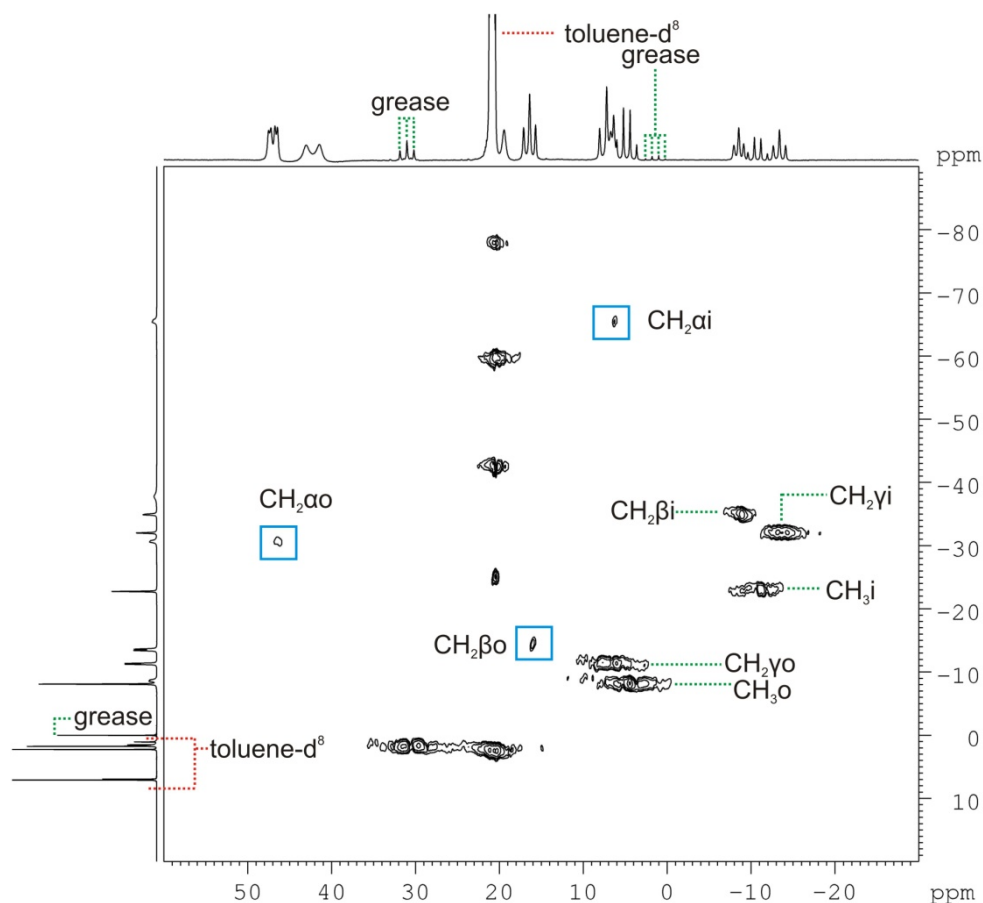

**Figure S21.**  $^1\text{H}$ ,  $^{13}\text{C}$  NMR correlation spectrum (HETCOR,  $^{13}\text{C}$  in F2, horizontal) of compound **1** dissolved in toluene- $\text{d}^8$ , recorded at 14.09 T, at a temperature of 295.0 K. The crosspeaks of all the aliphatic groups are present. The assignments of aromatic resonances, that did not show crosspeaks in this experiment due to their fast relaxation, were made based on the values of their observed chemical shifts.

| Group:                          | $\delta_{\text{obs}}$ in $^1\text{H}$ NMR [ppm] | $\delta_{\text{obs}}$ in $^{13}\text{C}$ NMR [ppm] |
|---------------------------------|-------------------------------------------------|----------------------------------------------------|
| $\text{CH}_2\alpha\text{i}$     | -65.53                                          | 6.3                                                |
| $\text{CH}_2\beta\text{i}$      | -34.94                                          | -8.6                                               |
| $\text{CH}_2\gamma\text{i}$     | -32.01                                          | -13.4                                              |
| $\text{CH}_3\text{i}$           | -22.72                                          | -10.8                                              |
| $\text{C}_{\text{q}}\text{i}$   | /                                               | -210.3                                             |
| $\text{CH}_{\text{ar}}\text{i}$ | -140.98                                         | -56.2                                              |
| $\text{C}_{\text{qO}}\text{i}$  | /                                               | 19.4                                               |
| $\text{CH}_2\alpha\text{o}$     | -8.64; -30.63                                   | 47.0                                               |
| $\text{CH}_2\beta\text{o}$      | -13.51                                          | 16.4                                               |
| $\text{CH}_2\gamma\text{o}$     | -11.30                                          | 7.2                                                |
| $\text{CH}_3\text{o}$           | -8.09                                           | 4.8                                                |
| $\text{C}_{\text{qO}}$          | /                                               | -49.2                                              |
| $\text{CH}_{\text{arO}}$        | -37.73                                          | 42.2                                               |
| $\text{C}_{\text{qO}}\text{O}$  | /                                               | 112.0                                              |

**Table S16.** Observed  $^1\text{H}$  and  $^{13}\text{C}$  NMR chemical shifts ( $\delta_{\text{obs}}$ ) of **1** dissolved in toluene- $\text{d}^8$  at 295.0 K.



|                            |                   | $T = 295.0 \text{ K}$     |                                          |
|----------------------------|-------------------|---------------------------|------------------------------------------|
| Group:                     | Comments:         | $\delta_{pc}$ calc. [ppm] | $\delta_{hf}$ exptl. <sup>a)</sup> [ppm] |
| CH <sub>2</sub> $\alpha$ i |                   | -63.6                     | -62.4                                    |
| CH <sub>2</sub> $\beta$ i  |                   | -40.9                     | -40.4                                    |
| CH <sub>2</sub> $\gamma$ i |                   | -33.0                     | -32.4                                    |
| CH <sub>3</sub> i          |                   | -22.9                     | -24.9                                    |
| C <sub>q</sub> o           |                   | -113.8                    | -130.9                                   |
| CH <sub>ar</sub> i         |                   | -168.1                    | -169.7                                   |
| C <sub>q</sub> i           |                   | -264.3                    | -324.1                                   |
| CH <sub>2</sub> $\alpha$ o |                   | -25.8                     | -21.7                                    |
| CH <sub>2</sub> $\beta$ o  |                   | -18.9                     | -15.4                                    |
| CH <sub>2</sub> $\gamma$ o |                   | -14.5                     | -11.8                                    |
| CH <sub>3</sub> o          |                   | -11.8                     | -9.3                                     |
| C <sub>q</sub> o           | XRD <sup>b)</sup> | -50.5                     | -38.3                                    |
| CH <sub>ar</sub> o         | XRD <sup>b)</sup> | -66.7                     | -71.3                                    |
| C <sub>q</sub> o           | XRD <sup>b)</sup> | -96.3                     | -163.0                                   |

**Table S17.** Calculated  $pcs$  from model ( $\delta_{pc}$  calc.) vs. experimental hyperfine contributions to the overall observed chemical shifts ( $\delta_{hf}$  exptl.) in  $^{13}\text{C}$  NMR spectra of **1** dissolved in toluene- $d^8$  at a temperature of 295.0 K. a) The values of the experimental hyperfine shifts mentioned here correspond to the differences between the observed chemical shifts and the diamagnetic contributions to the chemical shifts. b) The pseudocontact shift for the indicated group was calculated as the average value of the pseudocontact shifts of the eight individual carbon atoms of this group (see asymmetric unit, Figure S31).

#### IV. Isointensity plots and estimated pseudocontact shifts (Eq. S1-S6, Fig. S22-S23, Table S18-S19)

The carbon atoms present in Figure 6 possess the same coordinates as those that were used in our model. The coordinates of aromatic carbon atoms of the outer ring were averaged from X-ray data (Table S13).

For a single terbium ion in a complex that has a magnetic anisotropy susceptibility value whose magnitude is 50% of the  $\chi_a$  value of complex **1** at 295 K, drawing an isointensity plot represents a trivial task of calculating the distance between a nucleus N and the terbium ion for all values of the  $\theta$  angle, ranging from  $0^\circ$  to  $360^\circ$ , that would give a certain pseudocontact shift. An isointensity plot for such a complex would appear as in Figure S22, with the metal center at the origin of the coordinate

system. The borderline region where the sign of the pseudocontact shift changes corresponds to a  $\theta$  angle of  $54.7356^\circ$ .

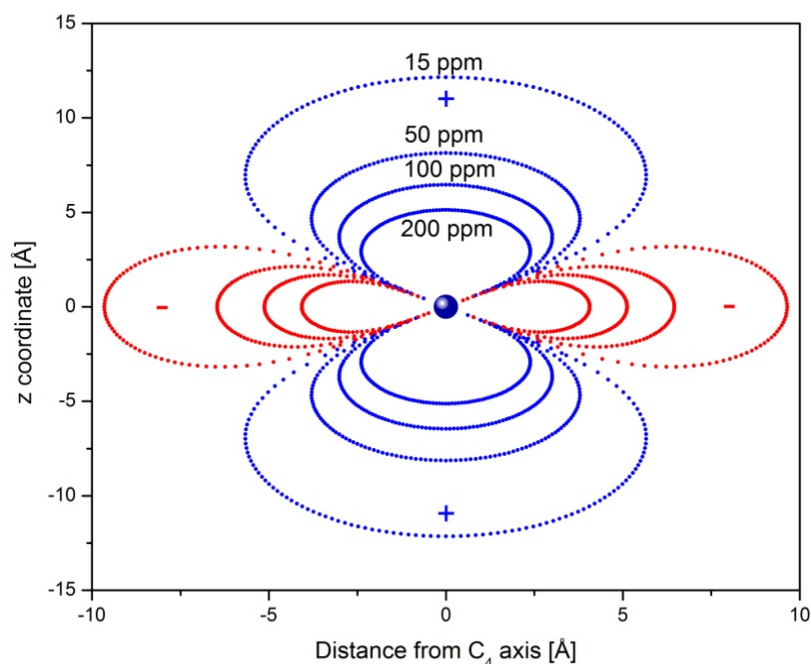

**Figure S22.** Isointensity plots of a complex with a single Terbium ion and a  $\chi_a$  value equal to 50% of that calculated for complex **1** dissolved in deuterated dichloromethane at 295.0 K. The values of the pseudocontact shifts are indicated, with positive values painted blue and marked with a plus sign, while negative values are painted red and marked with a minus sign. The single terbium ion is represented with a sphere of deep blue color.

In the approach to calculate the isointensity plots of complex **1**, the origin of a coordinate system was placed exactly between the two metal centers, on the molecular z axis (passing through both terbium ions, coincidental with the magnetic field axis). For a given distance along the z axis and a given distance away from the z axis (on the x axis), the (Z, X) coordinates can be used to fully describe a position of a nucleus relative to the two terbium ions, since the distance between these metal centers is known from the XRD data. For a nucleus with coordinates (Z, X) in this coordinate system, the corresponding distances from the proximal and distal terbium ions, as well as the angles between the nucleus-terbium ion vectors and the magnetic field (z axis) vector, can be obtained by using the following equations S1-S6:

$$r_{prox,z} = \left| (d_{Tb-Tb}/2) - kZ \right| \quad (S1)$$

$$r_{dist,z} = \left| (d_{Tb-Tb}/2) - mZ \right| \quad (S2)$$

$$r_{prox} = \sqrt{r_{prox,Z}^2 + X^2} \quad (S3)$$

$$r_{dist} = \sqrt{r_{dist,Z}^2 + X^2} \quad (S4)$$

$$\theta_{dist} = \arcsin(X / r_{dist}) \quad (S5)$$

$$\theta_{prox} = \arcsin(X / r_{prox}) \quad (S6)$$

Where  $Z$  is the distance from the origin along the  $z$  axis,  $k$  is +1 for  $Z$  larger than zero and -1 for  $Z$  smaller than zero,  $m$  is -1 for  $Z$  larger than zero and +1 for  $Z$  smaller than zero,  $X$  denotes the distance of nucleus N from the  $z$  axis,  $r_{prox,Z}$  is the distance between nucleus N and the proximal terbium ion only along the  $z$  axis,  $r_{dist,Z}$  is the distance between nucleus N and the distal terbium ion only along the  $z$  axis (note that in this coordinate system the proximal terbium is the one with a positive value on the  $z$  axis and the distal terbium has a negative value on the  $z$  axis),  $d_{Tb-Tb}$  is the XRD distance between the two metal centers,  $r_{prox}$  is the absolute distance between nucleus N at coordinates ( $Z$ ,  $X$ ) and the proximal terbium ion,  $r_{dist}$  is the absolute distance between the same nucleus N and the distal terbium ion,  $\theta_{prox}$  and  $\theta_{dist}$  are the angles between the nucleus N-Tb vectors and  $z$  axis for the proximal and distal terbium ions, respectively. The equations above relate  $r_{prox}$ ,  $r_{dist}$ ,  $\theta_{prox}$  and  $\theta_{dist}$  (from equation 8) to a two dimensional coordinate system with an origin placed at the center of the complex.

Distances from the origin along the  $z$  axis, ranging from -10.0 to 10.0 Å were generated (with increments of 0.1 Å). The objective was to find a distance  $X$  away from the  $z$  axis that would, when utilized in equations S1-S6, lead to a calculated value of the pseudocontact shift that matches a pre-set value. This approach enables an isointensity plot to be produced by having one variable only, i.e.  $X$ , for a given value of  $Z$ . The fastest way to find the satisfactory values of  $X$  was by using iterations.

The Microsoft Visual Basic code for the Excel Macro used for producing isointensity plots is given here:

```
Sub solver_iteration()
Dim count
For count = 10 To 210
SolverOk SetCell:="$S$" & count, MaxMinVal:=3, ValueOf:="200", _
ByChange:="$J$" & count
SolverOptions MaxTime:=100, Iterations:=100, Precision:=0.001, AssumeLinear:= _
False, StepThru:=False, Estimates:=1, Derivatives:=1, SearchOption:=1, _
IntTolerance:=5, Scaling:=False, Convergence:=0.001, AssumeNonNeg:=False
SolverOk SetCell:="$S$" & count, MaxMinVal:=3, ValueOf:="200", _
ByChange:="$J$" & count
SolverSolve True
Next
End Sub
```

The chemical shift value to be calculated (in ppm) is to be inserted as the "ValueOf" parameter. The code then searches for a best value of  $X$  (located in column J), that would make the absolute values in

column S equal to the sought after pseudocontact shift value (hence also enabling a negative value to be calculated for the pseudocontact shift). Only values of  $X$  that ultimately gave a match between the “ValueOf” parameter and the absolute value of the corresponding chemical shift in column S were kept and plotted on both sides of the x axis in Figure 6 of the main text. This procedure was repeated for each of the 200 generated distances along the z axis (that in this case occupied rows 10 to 210). It is interesting to mention that, when utilizing the approach above to find values of  $X$  that would lead to a pseudocontact shift of 10000 ppm, the isointensity plot shows a region where the pseudocontact shifts are positive between the two terbium ions, i.e. at close distances to the terbium ions, the individual effects of each one of them can be observed. This roughly resembles two isointensity plots of single terbium ions being brought together and overlapping. This isointensity plot is given in Figure S23.

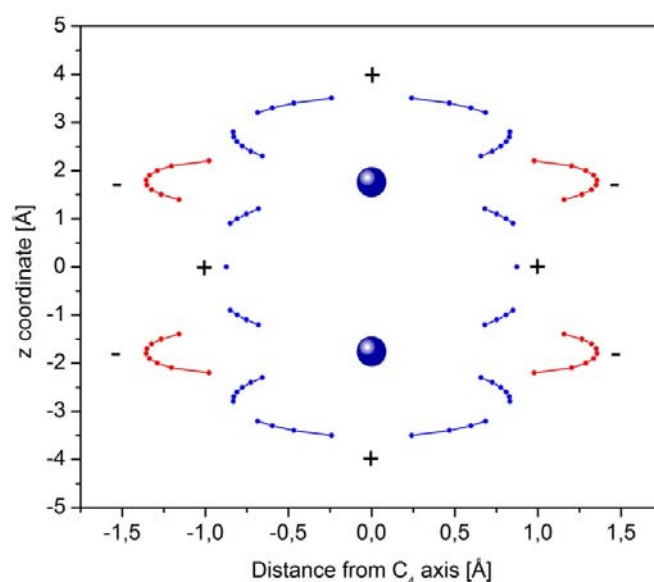

**Figure S23.** Isointensity plot of **1** at 295.0 K for the extreme case of a pseudocontact shift of 10000 ppm. Positive pseudocontact shift values are painted blue and marked with a plus sign, while negative values are painted red and marked with a minus sign. Terbium ions are represented by the two spheres colored in deep blue. The magnetic susceptibility anisotropy value used in this calculation was derived from the  $^{13}\text{C}$  NMR spectrum of **1** dissolved in  $\text{CD}_2\text{Cl}_2$ .

Isointensity plots have previously been used for the study of  $^1\text{H}$  NMR spectra of mononuclear and dinuclear phthalocyanine based lanthanide complexes by Ishikawa et al.<sup>ii</sup>

| Atom:              | C <sub>No</sub> |                     |                |                     |                                |
|--------------------|-----------------|---------------------|----------------|---------------------|--------------------------------|
|                    | $r_{prox}$ [Å]  | $\theta_{prox}$ [°] | $r_{dist}$ [Å] | $\theta_{dist}$ [°] | $\delta_{pc}$ at 295.0 K [ppm] |
| 1                  | 3.3400          | 63.71               | 5.8240         | 30.94               | -132.9                         |
| 2                  | 3.2750          | 67.13               | 5.6600         | 32.21               | -248.9                         |
| 3                  | 3.3500          | 61.83               | 5.8920         | 30.09               | -73.4                          |
| 4                  | 3.3500          | 61.03               | 5.9160         | 29.70               | -47.8                          |
| 5                  | 3.3260          | 61.98               | 5.8670         | 30.03               | -80.8                          |
| 6                  | 3.3010          | 64.92               | 5.7450         | 31.31               | -176.2                         |
| 7                  | 3.2800          | 67.20               | 5.6590         | 32.33               | -249.7                         |
| 8                  | 3.2720          | 69.57               | 5.6120         | 32.87               | -317.7                         |
| Average            | 3.2948          | 65.92               | 5.7208         | 31.64               | -206.1                         |
| Standard Deviation | 0.0242          | 3.24                | 0.1120         | 1.25                | 101.6                          |

**Table S18.** Coordinates of the C<sub>No</sub> carbon atoms, as taken from the asymmetric unit of the crystal structure of **1** (Figure S31), and the calculated pseudocontact shift contributions to the hyperfine shift of the C<sub>No</sub> resonance at 295.0 K, calculated with these coordinates. Applies for **1** dissolved in CD<sub>2</sub>Cl<sub>2</sub>. C<sub>No</sub> was not observed experimentally.

| Atom:              | C <sub>Ni</sub> |                     |                |                     |                                |
|--------------------|-----------------|---------------------|----------------|---------------------|--------------------------------|
|                    | $r_{prox}$ [Å]  | $\theta_{prox}$ [°] | $r_{dist}$ [Å] | $\theta_{dist}$ [°] | $\delta_{pc}$ at 295.0 K [ppm] |
| 1                  | 3.5346          | 122.81              | 3.3746         | 61.68               | -300.2                         |
| 2                  | 3.5113          | 121.96              | 3.4092         | 60.91               | -296.8                         |
| 3                  | 3.4376          | 120.14              | 3.4705         | 58.94               | -291.5                         |
| 4                  | 3.3709          | 118.22              | 3.5380         | 57.08               | -300.7                         |
| Average            | 3.4636          | 120.78              | 3.4481         | 59.65               | -297.3                         |
| Standard Deviation | 0.0743          | 2.04                | 0.0719         | 2.07                | 4.3                            |

**Table S19.** Coordinates of the C<sub>Ni</sub> carbon atoms, as taken from the asymmetric unit of the crystal structure of **1** (Figure S31), and the calculated pseudocontact shift contributions to the hyperfine shift of the C<sub>Ni</sub> resonance at 295.0 K, calculated with these coordinates. Applies for **1** dissolved in CD<sub>2</sub>Cl<sub>2</sub>. C<sub>Ni</sub> was not observed experimentally.

V.  $^1\text{H}$  NMR *pcs* according to the model established for fitting the  $^{13}\text{C}$  NMR data (Table S20-S22)

| Group:                | Comments:              | $r_{prox}$ [Å] | $\theta_{prox}$ [°] | $r_{dist}$ [Å] | $\theta_{dist}$ [°] |
|-----------------------|------------------------|----------------|---------------------|----------------|---------------------|
| $\text{CH}_2\alpha_i$ |                        | 8.0101         | 96.14               | 8.3965         | 71.53               |
| $\text{CH}_2\beta_i$  |                        | 10.2208        | 94.86               | 10.5233        | 75.41               |
| $\text{CH}_2\gamma_i$ |                        | 10.5039        | 94.73               | 10.7985        | 75.79               |
|                       |                        | 12.4587        | 93.94               | 12.7105        | 77.92               |
| $\text{CH}_3i$        |                        | 12.8675        | 97.93               | 12.8627        | 82.22               |
|                       |                        | 12.7024        | 102.00              | 12.4554        | 85.97               |
| $\text{CH}_{ar}i$     |                        | 6.1329         | 106.66              | 6.1329         | 73.34               |
| $\text{CH}_2\alpha_o$ | farther $^1\text{H}^a$ | 8.4574         | 66.41               | 10.3775        | 48.32               |
|                       | closer $^1\text{H}^a$  | 8.3113         | 78.25               | 9.6616         | 57.38               |
| $\text{CH}_2\beta_o$  | farther $^1\text{H}^a$ | 10.5303        | 70.38               | 12.1706        | 54.59               |
|                       | closer $^1\text{H}^a$  | 10.4017        | 79.91               | 11.5489        | 62.47               |
| $\text{CH}_2\gamma_o$ | farther $^1\text{H}^a$ | 11.0160        | 67.97               | 12.7584        | 53.17               |
|                       | closer $^1\text{H}^a$  | 10.6999        | 76.94               | 11.9939        | 60.35               |
| $\text{CH}_3o$        | 1st $^1\text{H}$       | 12.8547        | 72.03               | 14.3353        | 58.54               |
|                       | 2nd $^1\text{H}$       | 13.0584        | 74.45               | 14.4052        | 60.85               |
|                       | 3rd $^1\text{H}$       | 12.5778        | 79.73               | 13.6507        | 65.04               |

**Table S20.** Coordinates of the  $^1\text{H}$  nuclei, according to the created model of the inner and outer phthalocyaninato ligands. Because of the symmetry restriction of the inner ring, coordinates for only one of the two  $^1\text{H}$  nuclei of the inner alkyl chain are needed in further calculations. a) For the methylene groups of the outer phthalocyaninato ligand, the protons are also distinguished in this table by qualitatively describing them as further away from or closer to the two terbium centers of the complex.

| Group:             | Comments:                            | <i>T</i> [K]                 |                                             |                              |                                             |                              |                                             |
|--------------------|--------------------------------------|------------------------------|---------------------------------------------|------------------------------|---------------------------------------------|------------------------------|---------------------------------------------|
|                    |                                      | 265.0                        |                                             | 275.0                        |                                             | 285.0                        |                                             |
|                    |                                      | $\delta_{pc}$ calc.<br>[ppm] | $\delta_{hf}$ exptl. <sup>b)</sup><br>[ppm] | $\delta_{pc}$ calc.<br>[ppm] | $\delta_{hf}$ exptl. <sup>b)</sup><br>[ppm] | $\delta_{pc}$ calc.<br>[ppm] | $\delta_{hf}$ exptl. <sup>b)</sup><br>[ppm] |
| CH <sub>2</sub> ai |                                      | -103.55                      | -99.99                                      | -95.75                       | -92.39                                      | -88.76                       | -85.45                                      |
| CH <sub>2</sub> βi |                                      | -54.53                       | -56.14                                      | -50.42                       | -52.16                                      | -46.74                       | -48.46                                      |
| CH <sub>2</sub> yi |                                      | -50.62                       | -49.44                                      | -46.81                       | -45.78                                      | -43.39                       | -42.45                                      |
| CH <sub>3</sub>    | 1st <sup>1</sup> H                   | -31.57                       | -36.06                                      | -29.19                       | -33.63                                      | -27.06                       | -31.39                                      |
|                    | 2nd <sup>1</sup> H                   | -30.01                       | -36.06                                      | -27.75                       | -33.63                                      | -25.72                       | -31.39                                      |
|                    | 3rd <sup>1</sup> H                   | -31.62                       | -36.06                                      | -29.24                       | -33.63                                      | -27.11                       | -31.39                                      |
|                    | average                              | -31.07                       | -36.06                                      | -28.73                       | -33.63                                      | -26.63                       | -31.39                                      |
| CH <sub>ar</sub> i |                                      | -221.07                      | -218.36                                     | -204.43                      | -202.44                                     | -189.50                      | -187.75                                     |
| CH <sub>2</sub> αo | farther <sup>1</sup> H <sup>a)</sup> | -19.19                       | -28.11                                      | -17.74                       | -25.99                                      | -16.45                       | -24.10                                      |
|                    | closer <sup>1</sup> H <sup>a)</sup>  | -56.41                       | -57.74                                      | -52.17                       | -52.61                                      | -48.36                       | -47.99                                      |
| CH <sub>2</sub> βo | farther <sup>1</sup> H <sup>a)</sup> | -19.04                       | -27.12                                      | -17.61                       | -25.01                                      | -16.32                       | -23.08                                      |
|                    | closer <sup>1</sup> H <sup>a)</sup>  | -35.19                       | -28.59                                      | -32.54                       | -26.22                                      | -30.16                       | -24.07                                      |
| CH <sub>2</sub> yo | farther <sup>1</sup> H <sup>a)</sup> | -13.36                       | -23.61                                      | -12.35                       | -21.56                                      | -11.45                       | -19.79                                      |
|                    | closer <sup>1</sup> H <sup>a)</sup>  | -28.61                       | -23.61                                      | -26.45                       | -21.73                                      | -24.52                       | -20.01                                      |
| CH <sub>3</sub> o  | 1st <sup>1</sup> H                   | -13.48                       | -17.30                                      | -12.47                       | -15.91                                      | -11.56                       | -14.68                                      |
|                    | 2nd <sup>1</sup> H                   | -15.18                       | -17.30                                      | -14.04                       | -15.91                                      | -13.01                       | -14.68                                      |
|                    | 3rd <sup>1</sup> H                   | -21.58                       | -17.30                                      | -19.96                       | -15.91                                      | -18.50                       | -14.68                                      |
|                    | average                              | -16.75                       | -17.30                                      | -15.49                       | -15.91                                      | -14.36                       | -14.68                                      |
| CH <sub>ar</sub> o | XRD <sup>c)</sup>                    | -92.18                       | -81.04                                      | -85.24                       | -74.94                                      | -79.02                       | -69.35                                      |

**Table S21.** Calculated *pcs* from model ( $\delta_{pc}$  calc.) vs. experimental hyperfine contributions to the overall observed chemical shifts ( $\delta_{pc}$  exptl.) in <sup>1</sup>H NMR spectra of **1** dissolved in CD<sub>2</sub>Cl<sub>2</sub>, at temperatures 265.0 K – 285.0 K. a) Within each methylene group of the outer phthalocyaninato ligands, a distinction is made between the <sup>1</sup>H nuclei based on their distance to the two metal centers of the complex **1**. b) The values of the experimental pseudocontact shift mentioned here correspond to the difference between the observed chemical shifts and the orbital contributions to the chemical shifts. c) The pseudocontact shift for the CH<sub>ar</sub>o group was calculated as the average value of the pseudocontact shifts of the eight individual CH<sub>ar</sub>o carbon atoms (see asymmetric unit of **1**, Figure S31).

| Group:                     | Comments:                            | <i>T</i> [K]                 |                                             |                              |                                             |                              |                                             |
|----------------------------|--------------------------------------|------------------------------|---------------------------------------------|------------------------------|---------------------------------------------|------------------------------|---------------------------------------------|
|                            |                                      | 295.0                        |                                             | 305.0                        |                                             | 315.0                        |                                             |
|                            |                                      | $\delta_{pc}$ calc.<br>[ppm] | $\delta_{hf}$ exptl. <sup>b)</sup><br>[ppm] | $\delta_{pc}$ calc.<br>[ppm] | $\delta_{hf}$ exptl. <sup>b)</sup><br>[ppm] | $\delta_{pc}$ calc.<br>[ppm] | $\delta_{hf}$ exptl. <sup>b)</sup><br>[ppm] |
| CH <sub>2</sub> $\alpha$ i |                                      | -82.41                       | -79.23                                      | -76.63                       | -73.64                                      | -71.49                       | -68.57                                      |
| CH <sub>2</sub> $\beta$ i  |                                      | -43.40                       | -45.19                                      | -40.35                       | -42.26                                      | -37.64                       | -39.58                                      |
| CH <sub>2</sub> $\gamma$ i |                                      | -40.29                       | -39.47                                      | -37.46                       | -36.81                                      | -34.95                       | -34.37                                      |
| CH <sub>3</sub>            | 1st <sup>1</sup> H                   | -25.12                       | -29.37                                      | -23.36                       | -27.54                                      | -21.79                       | -25.83                                      |
|                            | 2nd <sup>1</sup> H                   | -23.88                       | -29.37                                      | -22.21                       | -27.54                                      | -20.71                       | -25.83                                      |
|                            | 3rd <sup>1</sup> H                   | -25.17                       | -29.37                                      | -23.40                       | -27.54                                      | -21.83                       | -25.83                                      |
|                            | average                              | -24.72                       | -29.37                                      | -22.99                       | -27.54                                      | -21.45                       | -25.83                                      |
| CH <sub>ar</sub> i         |                                      | -175.95                      | -174.69                                     | -163.61                      | -163.03                                     | -152.62                      | -152.47                                     |
| CH <sub>2</sub> $\alpha$ o | farther <sup>1</sup> H <sup>a)</sup> | -15.27                       | -22.45                                      | -14.20                       | -21.02                                      | -13.25                       | -19.72                                      |
|                            | closer <sup>1</sup> H <sup>a)</sup>  | -44.90                       | -43.93                                      | -41.75                       | -40.37                                      | -38.95                       | -37.23                                      |
| CH <sub>2</sub> $\beta$ o  | farther <sup>1</sup> H <sup>a)</sup> | -15.15                       | -21.36                                      | -14.09                       | -19.86                                      | -13.14                       | -18.50                                      |
|                            | closer <sup>1</sup> H <sup>a)</sup>  | -28.00                       | -22.16                                      | -26.04                       | -20.52                                      | -24.29                       | -19.05                                      |
| CH <sub>2</sub> $\gamma$ o | farther <sup>1</sup> H <sup>a)</sup> | -10.63                       | -18.27                                      | -9.88                        | -16.95                                      | -9.22                        | -15.73                                      |
|                            | closer <sup>1</sup> H <sup>a)</sup>  | -22.77                       | -18.52                                      | -21.17                       | -17.21                                      | -19.75                       | -16.03                                      |
| CH <sub>3</sub> o          | 1st <sup>1</sup> H                   | -10.73                       | -13.62                                      | -9.98                        | -12.70                                      | -9.31                        | -11.86                                      |
|                            | 2nd <sup>1</sup> H                   | -12.08                       | -13.62                                      | -11.23                       | -12.70                                      | -10.48                       | -11.86                                      |
|                            | 3rd <sup>1</sup> H                   | -17.18                       | -13.62                                      | -15.97                       | -12.70                                      | -14.90                       | -11.86                                      |
|                            | average                              | -13.33                       | -13.62                                      | -12.39                       | -12.70                                      | -11.56                       | -11.86                                      |
| CH <sub>ar</sub> o         | XRD <sup>c)</sup>                    | -73.36                       | -64.40                                      | -68.22                       | -59.97                                      | -63.64                       | -55.94                                      |

**Table S22.** Calculated *pcs* from model ( $\delta_{pc}$  calc.) vs. experimental hyperfine contributions to the overall observed chemical shifts ( $\delta_{pc}$  exptl.) in <sup>1</sup>H NMR spectra of **1** dissolved in CD<sub>2</sub>Cl<sub>2</sub>, at temperatures 295.0 K – 315.0 K. a) Within each methylene group of the outer phthalocyaninato ligands, a distinction is made between the <sup>1</sup>H nuclei based on their distance to the two metal centers of the complex **1**. b) The values of the experimental pseudocontact shift mentioned here correspond to the difference between the observed chemical shifts and the orbital contributions to the chemical shifts. c) The pseudocontact shift for the CH<sub>ar</sub>o group was calculated as the average value of the pseudocontact shifts of the eight individual CH<sub>ar</sub>o carbon atoms (see asymmetric unit of **1**, Figure S31).



# VI. Measured total couplings (Table S23-S26)

|                    |                                  | <i>T</i> [K]                                                                                      |       |       |       |       |       |
|--------------------|----------------------------------|---------------------------------------------------------------------------------------------------|-------|-------|-------|-------|-------|
|                    |                                  | 265.0                                                                                             | 275.0 | 285.0 | 295.0 | 305.0 | 315.0 |
| Group:             | Comments:                        | <sup>13</sup> C NMR Data: <sup>1</sup> <i>T</i> ( <sup>13</sup> C- <sup>1</sup> H) couplings [Hz] |       |       |       |       |       |
| CH <sub>2</sub> αi |                                  | 35.0                                                                                              | 42.0  | 55.0  | 65.0  | /     | 82.0  |
| CH <sub>2</sub> βi |                                  | /                                                                                                 | 93.0  | 94.0  | 94.0  | 97.0  | 104.0 |
| CH <sub>2</sub> γi |                                  | /                                                                                                 | 112.4 | 112.5 | 113.4 | 115.0 | 116.1 |
| CH <sub>3</sub> i  |                                  | 113.3                                                                                             | 114.0 | 115.8 | 116.5 | /     | 119.0 |
| CH <sub>ar</sub> i |                                  | 266.0                                                                                             | 249.0 | 236.0 | 223.0 | 215.0 | 205.0 |
| CH <sub>2</sub> αo | 1st <sup>1</sup> H <sup>a)</sup> | 0.0                                                                                               | 23.0  | 45.0  | 58.0  | 71.0  | 83.5  |
|                    | 2nd <sup>1</sup> H <sup>a)</sup> | 70.5                                                                                              | 80.0  | 89.0  | 96.0  | 102.5 | 107.0 |
| CH <sub>2</sub> βo | 1st <sup>1</sup> H <sup>a)</sup> | 110.0                                                                                             | 111.0 | 113.0 | 113.0 | 115.0 | 116.0 |
|                    | 2nd <sup>1</sup> H <sup>a)</sup> | 70.0                                                                                              | 79.0  | 88.0  | 95.0  | 98.0  | 102.0 |
| CH <sub>2</sub> γo | <sup>b)</sup>                    | /                                                                                                 | 118.1 | 120.2 | 121.6 | 122.9 | 123.6 |
| CH <sub>3</sub> o  |                                  | 113.0                                                                                             | 115.3 | 117.5 | 118.4 | 119.0 | 120.0 |
| CH <sub>ar</sub> o |                                  | /                                                                                                 | 264.0 | 253.0 | 242.0 | 233.0 | 225.0 |

**Table S23.** Measured total <sup>13</sup>C-<sup>1</sup>H couplings, as observed from <sup>13</sup>C NMR spectra of **1** recorded at different temperatures. The “/” sign indicates the values of the total coupling that were not extractable, due to overlapping signals that could not have been deconvoluted. a) Since the methylene groups of the outer phthalocyaninato ligands are diastereotopic, the corresponding <sup>13</sup>C nucleus shows a coupling to each of the <sup>1</sup>H nuclei separately. b) For the CH<sub>2</sub>γo group, a triplet was observed at all temperatures. CD<sub>2</sub>Cl<sub>2</sub> was used as a solvent.

|                             |                       | $T$ [K]                                                                |        |        |        |        |        |
|-----------------------------|-----------------------|------------------------------------------------------------------------|--------|--------|--------|--------|--------|
|                             |                       | 265.0                                                                  | 275.0  | 285.0  | 295.0  | 305.0  | 315.0  |
| Group:                      | Comments:             | $^1\text{H}$ NMR Data: $^1T$ ( $^1\text{H}$ - $^1\text{H}$ ) couplings |        |        |        |        |        |
| $\text{CH}_2\alpha\text{i}$ |                       | -259.9                                                                 | -226.3 | -194.2 | -163.3 | -133.0 | -101.2 |
| $\text{CH}_2\beta\text{i}$  |                       | -61.5                                                                  | -46.6  | -35.0  | -21.6  | N. A.  | N. A.  |
|                             | farther $^1\text{H}$  | -168.9                                                                 | -144.0 | -122.7 | -105.6 | -90.7  | -75.2  |
| $\text{CH}_2\alpha\text{o}$ | closer $^1\text{H}$   | -166.6                                                                 | -141.6 | -121.5 | -104.7 | -87.0  | -75.3  |
|                             | average <sup>a)</sup> | -167.8                                                                 | -142.8 | -122.1 | -105.2 | -88.9  | -75.3  |
|                             | farther $^1\text{H}$  | -50.9                                                                  | -42.0  | -34.8  | -31.8  | -22.5  | -13.0  |
| $\text{CH}_2\beta\text{o}$  | closer $^1\text{H}$   | -50.8                                                                  | -42.0  | -33.9  | -31.7  | -21.7  | -12.9  |
|                             | average <sup>a)</sup> | -50.9                                                                  | -42.0  | -34.4  | -31.8  | -22.1  | -13.0  |

**Table S24.** Measured total <sup>1</sup>H-<sup>1</sup>H couplings, as observed from <sup>1</sup>H NMR of **1** spectra recorded at different temperatures. CD<sub>2</sub>Cl<sub>2</sub> was used as a solvent. For A<sub>2</sub> systems, <sup>1</sup>*T*<sub>HH</sub> = 1.5·*D*<sub>HH</sub>. a) For the methylene groups of the outer ring, average values of the measured total couplings are taken in further calculations. “N. A.” denotes that no coupling information was extractable at this temperature due to coalescence.

| Group:                                                                              | <i>T</i> [K] |       |       |       |       |       |
|-------------------------------------------------------------------------------------|--------------|-------|-------|-------|-------|-------|
|                                                                                     | 265.0        | 275.0 | 285.0 | 295.0 | 305.0 | 315.0 |
| Errors in <sup>1</sup> <i>T</i> <sub>CH</sub> from <sup>13</sup> C NMR spectra [Hz] |              |       |       |       |       |       |
| CH <sub>2</sub> αi                                                                  | 5.0          | 5.0   | 5.0   | 5.0   | /     | 5.0   |
| CH <sub>2</sub> βi                                                                  | /            | 0.5   | 2.0   | 2.0   | 1.5   | 1.0   |
| CH <sub>2</sub> γi                                                                  | /            | 0.5   | 1.0   | 0.5   | 1.5   | 1.5   |
| CH <sub>3</sub> i                                                                   | 0.5          | 0.3   | 0.2   | 3.0   | /     | 1.0   |
| CH <sub>ar</sub> i                                                                  | 6.0          | 5.0   | 5.0   | 5.0   | 5.0   | 5.0   |
| CH <sub>2</sub> αo                                                                  | 2.0          | 2.0   | 2.0   | 2.0   | 1.5   | 2.0   |
| CH <sub>2</sub> βo                                                                  | 1.0          | 1.0   | 1.0   | 1.0   | 0.5   | 0.5   |
| CH <sub>2</sub> γo                                                                  | /            | 1.0   | 1.0   | 1.0   | 0.5   | 0.5   |
| CH <sub>3</sub> o                                                                   | 1.0          | 0.5   | 1.0   | 1.0   | 2.0   | 1.5   |
| CH <sub>ar</sub> o                                                                  | /            | 4.0   | 4.0   | 3.0   | 2.5   | 2.0   |

**Table S25.** Errors in reading the values of the total observed <sup>13</sup>C-<sup>1</sup>H couplings in <sup>13</sup>C NMR spectra of **1** dissolved in CD<sub>2</sub>Cl<sub>2</sub>, for all temperatures at which spectra were recorded. These errors were estimated by slightly changing the phase of the spectrum or by modifying the linear back-prediction parameter in TopSpin. The errors of the order parameters originate from the errors in this table.

| Group:             | T [K]                                                                               |       |       |       |       |       |
|--------------------|-------------------------------------------------------------------------------------|-------|-------|-------|-------|-------|
|                    | 265.0                                                                               | 275.0 | 285.0 | 295.0 | 305.0 | 315.0 |
|                    | <sup>1</sup> H NMR Data: <sup>1</sup> T ( <sup>1</sup> H- <sup>1</sup> H) couplings |       |       |       |       |       |
| CH <sub>2</sub> αi | 1.5                                                                                 | 1.5   | 1.5   | 1.5   | 2.5   | 1.5   |
| CH <sub>2</sub> βi | 2.0                                                                                 | 3.0   | 3.5   | 5.0   | N. A. | N. A. |
| CH <sub>2</sub> αo | 2.0                                                                                 | 1.0   | 2.0   | 2.0   | 2.5   | 2.0   |
| CH <sub>2</sub> βo | 2.0                                                                                 | 2.0   | 2.0   | 2.0   | 2.0   | 5.0   |

**Table S26.** Errors in reading the values of the total observed <sup>1</sup>H-<sup>1</sup>H couplings in <sup>1</sup>H NMR spectra of **1** dissolved in CD<sub>2</sub>Cl<sub>2</sub>, for all temperatures at which spectra were recorded. These errors were estimated by slightly changing the phase of the spectrum or by modifying the linear back-prediction parameter in TopSpin. The errors of the order parameters originate from the errors in this table.

## VII. Dynamic frequency shifts (Eq. S7-S11, Fig. S24, Table S27-S29)

For calculation of the dynamic frequency shift of complex **1**, the equation reported by Ghose and Prestegard<sup>iii</sup> was adapted for two metal centers present in SMM **1**.

$$\Delta\nu_{DFS} = \frac{1}{8\pi} g_e \mu_e \frac{B_0 S_e (S_e + 1)}{kT} \frac{\varepsilon_{DD} \varepsilon_{CSR}}{2r_{AX}^3} \left( \frac{3 \cos^2 \theta_1 - 1}{r_{e1}^3} + \frac{3 \cos^2 \theta_2 - 1}{r_{e2}^3} \right) \frac{\tau_c^2 \omega}{(1 + \omega^2 \tau_c^2)} \quad (S7)$$

where  $\varepsilon_{DD}$  and  $\varepsilon_{CSR}$  are given by equations S8 and S9, respectively.

$$\varepsilon_{DD} = -(24 \pi / 5)^{1/2} (\mu_0 / 4 \pi) \hbar \gamma_A \gamma_X \quad (S8)$$

$$\varepsilon_{CSR} = -(24 \pi / 5)^{1/2} (\mu_0 / 4 \pi) \hbar \gamma_A \gamma_e \quad (S9)$$

$g_e$  is the electron g-factor,  $\mu_e$  is the electronic Bohr magneton,  $B_0$  is the external magnetic field strength (in units of Tesla),  $S_e$  is the electronic spin of the terbium ion ( $S_e = 3$ ),  $\mu_0$  is the vacuum permeability,  $\gamma_A$ ,  $\gamma_X$  and  $\gamma_e$  are the gyromagnetic ratios of the observed nuclei A, its neighboring nuclei X and the electron, respectively,  $r_{AX}$  is the distance between nuclei A and X,  $\theta_1$  is the angle between the A-one terbium ion and AX vectors,  $\theta_2$  is the angle between the A-other terbium ion and AX vectors,  $r_{e1}$  is the distance between nucleus A and the first terbium ion,  $r_{e2}$  is the distance between the nucleus A and the second terbium ion,  $\tau_c$  is the correlation time for overall molecular tumbling and  $\omega$  is the Larmor frequency of nucleus A.

| Group:             | Comments:                            | $r_{prox}$ [Å] | $\theta_{prox}$ [°] | $r_{dist}$ [Å] | $\theta_{dist}$ [°] |
|--------------------|--------------------------------------|----------------|---------------------|----------------|---------------------|
| CH <sub>2</sub> αi |                                      | 8.5242         | 58.65               | 8.5242         | 79.63               |
| CH <sub>2</sub> βi |                                      | 10.0068        | 98.24               | 10.0068        | 115.48              |
| CH <sub>2</sub> γi |                                      | 10.8030        | 71.31               | 10.8030        | 86.87               |
|                    | 1st <sup>1</sup> H                   | 12.2811        | 96.84               | 12.2811        | 110.81              |
| CH <sub>3</sub> i  | 2nd <sup>1</sup> H                   | 12.2811        | 120.32              | 12.2811        | 120.01              |
|                    | 3rd <sup>1</sup> H                   | 12.2811        | 110.33              | 12.2811        | 96.67               |
| CH <sub>ar</sub> i |                                      | 5.7945         | 103.23              | 5.7945         | 103.23              |
|                    | farther <sup>1</sup> H <sup>a)</sup> | 8.6244         | 77.61               | 10.2042        | 96.10               |
| CH <sub>2</sub> αo | closer <sup>1</sup> H <sup>a)</sup>  | 8.6244         | 69.85               | 10.2042        | 57.53               |
|                    | farther <sup>1</sup> H <sup>a)</sup> | 10.1208        | 109.16              | 11.5756        | 120.72              |
| CH <sub>2</sub> βo | closer <sup>1</sup> H <sup>a)</sup>  | 10.1208        | 101.92              | 11.5756        | 85.87               |
|                    | farther <sup>1</sup> H <sup>a)</sup> | 10.9806        | 89.01               | 12.4520        | 103.88              |
| CH <sub>2</sub> γo | closer <sup>1</sup> H <sup>a)</sup>  | 10.9806        | 72.34               | 12.4520        | 62.91               |
|                    | 1st <sup>1</sup> H                   | 12.4400        | 109.99              | 13.7753        | 118.89              |
| CH <sub>3</sub> o  | 2nd <sup>1</sup> H                   | 12.4400        | 122.40              | 13.7753        | 123.36              |
|                    | 3rd <sup>1</sup> H                   | 12.4400        | 94.75               | 13.7753        | 81.19               |
| CH <sub>ar</sub> o |                                      | 5.7887         | 104.05              | 7.6076         | 98.72               |

**Table S27.** Coordinates used in equation S7 for calculating the dynamic frequency shift contribution to the total <sup>13</sup>C-<sup>1</sup>H coupling observed in <sup>13</sup>C NMR spectra of **1**. The coordinates were extracted from the model used for fitting the pseudocontact shifts of the <sup>13</sup>C resonances. a) The calculated dynamic frequency shifts are different for the two <sup>13</sup>C-<sup>1</sup>H vectors of the methylene groups in the outer phthalocyaninato ligand, and are hence distinguished by qualitatively describing these vectors as having the <sup>1</sup>H nucleus either further away from or closer to the two terbium centers.

| <sup>13</sup> C NMR frequencies taken for DFS calculations |                     |                                       |
|------------------------------------------------------------|---------------------|---------------------------------------|
| $T$ [K]                                                    | $\omega/2\pi$ [Mhz] | Taken at position <sup>a)</sup> [ppm] |
| 265.0                                                      | 150.88609988        | -110.0                                |
| 275.0                                                      | 150.88839758        | -95.0                                 |
| 285.0                                                      | 150.88984282        | -85.0                                 |
| 295.0                                                      | 150.89134501        | -75.0                                 |
| 305.0                                                      | 150.89361877        | -60.0                                 |
| 315.0                                                      | 150.89509433        | -50.0                                 |

**Table S28.** Frequencies of <sup>13</sup>C NMR nuclei that were used in the calculation of the dynamic frequency shift contribution to the observed total <sup>13</sup>C-<sup>1</sup>H couplings. a) For all <sup>13</sup>C NMR resonances of **1** in a spectrum recorded at a given temperature, the middle between the resonances that were most upfield and most downfield was taken as the value of  $\omega$  in equation S7. This Table refers to spectra recorded with CD<sub>2</sub>Cl<sub>2</sub> as solvent.

| Group:                     | Comments:                           | <i>T</i> [K]                                  |        |        |        |        |        |
|----------------------------|-------------------------------------|-----------------------------------------------|--------|--------|--------|--------|--------|
|                            |                                     | 265.0                                         | 275.0  | 285.0  | 295.0  | 305.0  | 315.0  |
|                            |                                     | $\eta$ [mPa·s]                                |        |        |        |        |        |
|                            |                                     | 0.588                                         | 0.517  | 0.462  | 0.419  | 0.386  | 0.360  |
|                            |                                     | $\tau_c$ [ps]                                 |        |        |        |        |        |
|                            |                                     | 1705                                          | 1447   | 1247   | 1093   | 974    | 879    |
|                            |                                     | $\Delta\nu_{DFS}$ in $^{13}\text{C}$ NMR [Hz] |        |        |        |        |        |
| CH <sub>2</sub> $\alpha$ i |                                     | -6.27                                         | -5.46  | -4.70  | -4.03  | -3.47  | -2.99  |
| CH <sub>2</sub> $\beta$ i  |                                     | -4.91                                         | -4.28  | -3.68  | -3.16  | -2.72  | -2.34  |
| CH <sub>2</sub> $\gamma$ i |                                     | -4.75                                         | -4.14  | -3.56  | -3.06  | -2.63  | -2.27  |
| CH <sub>3</sub> i          | averaged for all three $^1\text{H}$ | -2.35                                         | -2.04  | -1.76  | -1.51  | -1.30  | -1.12  |
| CH <sub>ar</sub> i         |                                     | -31.88                                        | -27.74 | -23.90 | -20.51 | -17.63 | -15.20 |
| CH <sub>2</sub> $\alpha$ o | farther $^1\text{H}^{\text{a)}$     | -8.02                                         | -6.98  | -6.01  | -5.16  | -4.43  | -3.82  |
|                            | closer $^1\text{H}^{\text{a)}$      | -4.03                                         | -3.50  | -3.02  | -2.59  | -2.23  | -1.92  |
| CH <sub>2</sub> $\beta$ o  | farther $^1\text{H}^{\text{a)}$     | -2.82                                         | -2.46  | -2.12  | -1.82  | -1.56  | -1.35  |
|                            | closer $^1\text{H}^{\text{a)}$      | -5.25                                         | -4.57  | -3.94  | -3.38  | -2.91  | -2.51  |
| CH <sub>2</sub> $\gamma$ o | farther $^1\text{H}^{\text{a)}$     | -4.21                                         | -3.67  | -3.16  | -2.71  | -2.33  | -2.01  |
|                            | closer $^1\text{H}^{\text{a)}$      | -2.64                                         | -2.30  | -1.98  | -1.70  | -1.46  | -1.26  |
| CH <sub>3</sub> o          | averaged for all three $^1\text{H}$ | -1.69                                         | -1.47  | -1.27  | -1.09  | -0.93  | -0.81  |
| CH <sub>ar</sub> o         |                                     | -23.40                                        | -20.36 | -17.54 | -15.05 | -12.94 | -11.16 |

**Table S29.** Viscosity data ( $\eta$ ) needed for the calculation of the correlation time for overall molecular tumbling ( $\tau_c$ ),  $\tau_c$  and dynamic frequency shifts calculated from coordinates in Table S27. a) The calculated dynamic frequency shifts are different for the two  $^{13}\text{C}$ - $^1\text{H}$  vectors of the methylene groups of the outer phthalocyaninato ligand, and are hence distinguished by qualitatively describing these vectors as having their  $^1\text{H}$  nucleus either further away from or closer to the two terbium centers in **1**.

The correlation time for overall molecular tumbling,  $\tau_c$ , was approximated from Stokes's law, using eq. S10<sup>iv</sup>:

$$\tau_c = \frac{4\pi r^3 \eta}{3kT} \quad (\text{S10})$$

where  $\tau_c$  is in seconds,  $r$  is the radius of the molecular sphere in meters,  $\eta$  is the viscosity of the solvent in Pa·s,  $k$  is the Boltzmann constant and  $T$  is the temperature in K. The radius  $r$  was approximated by using the largest  $r_{prox}$  distance from Table S20 (and corresponding  $\theta_{prox}$ , belonging to CH<sub>3</sub>o), and by using the XRD Tb-Tb distance of complex **1**. The value of  $r$  used in eq. S10 was thus 13.635 Å. The values of  $\eta$  for the temperature range from 265.0 K to 315.0 K were taken from the available literature on CH<sub>2</sub>Cl<sub>2</sub><sup>v</sup>, as  $\eta$  of CD<sub>2</sub>Cl<sub>2</sub> and  $\eta$  of CH<sub>2</sub>Cl<sub>2</sub> are nearly identical<sup>vi</sup> and as viscosity data was available for CD<sub>2</sub>Cl<sub>2</sub> only at room temperature.

The calculated values of  $\tau_c$  ranged from 1705 ps (265.0 K) to 879 ps (315.0 K) and are given in Table S29, as well as the values of  $\eta$  used in equation S10.

The dependence of  $\Delta\nu_{DFS}$  on  $\tau_c$  is shown in the following example, for a  $^1\text{H}$  (A) nucleus in a complex with only one metal ion in it. Accordingly, equation S7 becomes equation S11:

$$\Delta\delta_{DFS} = \frac{1}{8\pi} g_e \mu_e \frac{B_0 S_e (S_e + 1)}{kT} \frac{\varepsilon_{DD} \varepsilon_{CSR}}{2r_{AX}^3} \left( \frac{3\cos^2\theta - 1}{r_e^3} \right) \frac{\tau_c^2 \omega}{(1 + \omega^2 \tau_c^2)} \quad (\text{S11}^{\text{vi}})$$

In the example, the  $B_0$  was set to 14.09 T ( $\omega$  was accordingly set to  $2\pi \cdot 600.13$  MHz). It was taken that there is only one metal ion with  $S_e$  equal to 3/2. The neighboring nucleus X was taken to be a  $^{13}\text{C}$  one,  $T$  was taken to be 298 K,  $r_{AX}$  was set to 1.1 Å,  $r_e$  was set to 10 Å and  $\theta$  was set to  $0^\circ$ . The dependence of  $\Delta\nu_{DFS}$  on  $\tau_c$  for this example is presented in Figure S24. This example was reproduced from the work of Ghose and Prestegard.<sup>iii</sup>

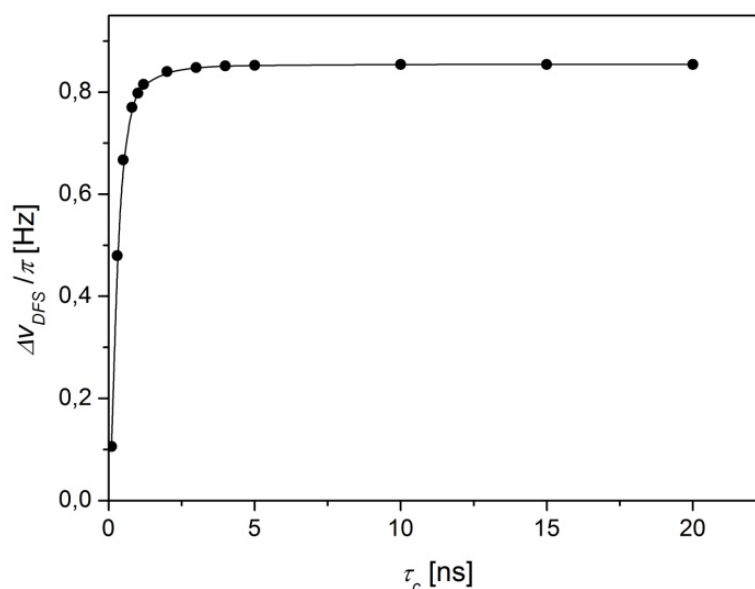

**Figure S24.** Plot of the variation in the magnitude of the shift of the resonance position of the  $^1\text{H}$  component of a  $^1\text{H}$ - $^{13}\text{C}$  doublet with a change in the correlation time  $\tau_c$ , for an exemplary complex with one metal center, where  $B_0 = 14.09$  T,  $S_e = 3/2$ ,  $T = 295$  K,  $r_{ax} = 1.1$  Å,  $r_e = 10$  Å and  $\theta = 0^\circ$ .

VIII. Residual dipolar couplings and the order parameter (Fig. S25-S26, Table S30-S36)

|                    |                                      | <i>T</i> [K]                                        |        |       |       |       |       |
|--------------------|--------------------------------------|-----------------------------------------------------|--------|-------|-------|-------|-------|
|                    |                                      | 265.0                                               | 275.0  | 285.0 | 295.0 | 305.0 | 315.0 |
| Group:             | Comments:                            | <i>D<sub>CH</sub></i> from <sup>13</sup> C NMR [Hz] |        |       |       |       |       |
| CH <sub>2</sub> αi |                                      | -99.7                                               | -93.5  | -81.3 | -72.0 | N. A. | -56.0 |
| CH <sub>2</sub> βi |                                      | N. A.                                               | -27.7  | -27.3 | -27.8 | -25.3 | -18.7 |
| CH <sub>2</sub> γi |                                      | N. A.                                               | -8.5   | -8.9  | -8.5  | -7.4  | -6.6  |
| CH <sub>3</sub> i  |                                      | -9.4                                                | -9.0   | -7.4  | -7.0  | N. A. | -4.9  |
| CH <sub>ar</sub> i |                                      | 139.5                                               | 118.3  | 101.5 | 85.1  | 74.2  | 61.8  |
|                    | farther <sup>1</sup> H <sup>a)</sup> | -133.0                                              | -111.0 | -90.0 | -77.8 | -65.6 | -53.7 |
| CH <sub>2</sub> αo |                                      |                                                     |        |       |       |       |       |
|                    | closer <sup>1</sup> H <sup>a)</sup>  | -66.5                                               | -57.5  | -49.0 | -42.4 | -36.3 | -32.1 |
|                    | farther <sup>1</sup> H <sup>a)</sup> | -12.2                                               | -11.5  | -9.9  | -10.2 | -8.4  | -7.7  |
| CH <sub>2</sub> βo |                                      |                                                     |        |       |       |       |       |
|                    | closer <sup>1</sup> H <sup>a)</sup>  | -49.7                                               | -41.4  | -33.1 | -26.6 | -24.1 | -20.5 |
| CH <sub>2</sub> γo | <sup>b)</sup>                        | N. A.                                               | -3.9   | -2.2  | -1.2  | -0.2  | 0.2   |
| CH <sub>3</sub> o  |                                      | -10.3                                               | -8.2   | -6.2  | -5.5  | -5.1  | -4.2  |
| CH <sub>ar</sub> o |                                      | N. A.                                               | 126.0  | 112.1 | 98.7  | 87.5  | 77.8  |

**Table S30.** <sup>13</sup>C-<sup>1</sup>H RDCs obtained from <sup>13</sup>C NMR spectra of **1** dissolved in CD<sub>2</sub>Cl<sub>2</sub>, recorded at different temperatures, at a field strength of 14.09 T. These values were obtained after the subtraction of scalar couplings and calculated DFS contributions from the observed total couplings. “N. A.” denotes cases where the extraction of <sup>1</sup>*T<sub>CH</sub>* was not possible due to signal broadness or overlaps a) Since the methylene groups of the outer phthalocyaninato ligands are diastereotopic, the corresponding <sup>13</sup>C nucleus shows a coupling to each of the <sup>1</sup>H nuclei. b) This <sup>13</sup>C NMR resonance gave a triplet, hence only one RDC value was extractable.

| Group:                                           | <i>T</i> [K]               |        |        |        |       |       |
|--------------------------------------------------|----------------------------|--------|--------|--------|-------|-------|
|                                                  | 265.0                      | 275.0  | 285.0  | 295.0  | 305.0 | 315.0 |
|                                                  | <i>D<sub>HH</sub></i> [Hz] |        |        |        |       |       |
| CH <sub>2</sub> α <sup>i</sup> <sup>a)</sup>     | -173.3                     | -150.9 | -129.5 | -108.9 | -88.7 | -67.5 |
| CH <sub>2</sub> β <sup>i</sup> <sup>a)</sup>     | -41.0                      | -31.1  | -23.3  | -14.4  | N. A. | N. A. |
| CH <sub>2</sub> α <sup>o</sup> <sup>b), c)</sup> | -157.0                     | -132.0 | -110.3 | -94.4  | -78.1 | -64.5 |
| CH <sub>2</sub> β <sup>o</sup> <sup>b), d)</sup> | -38.5                      | -29.6  | -22.0  | -19.4  | -9.7  | -0.6  |

**Table S31.** <sup>1</sup>H-<sup>1</sup>H RDCs obtained from <sup>1</sup>H NMR spectra of **1** dissolved in CD<sub>2</sub>Cl<sub>2</sub>, recorded at different temperatures, at a field strength of 14.09 T. a) For A<sub>2</sub> systems, <sup>1</sup>*T<sub>HH</sub>* = 1.5·*D<sub>HH</sub>*. b) These values correspond to the difference between the averaged <sup>1</sup>*T<sub>HH</sub>* (Table S24) and the geminal <sup>1</sup>H-<sup>1</sup>H couplings. c) <sup>2</sup>*J<sub>H-C-H</sub>* = -10.8 Hz (value reported for methanol)<sup>viii, d, e, f</sup>. d) <sup>2</sup>*J<sub>H-C-H</sub>* = -12.4 Hz (value reported for methane).<sup>vii a, b, c</sup>

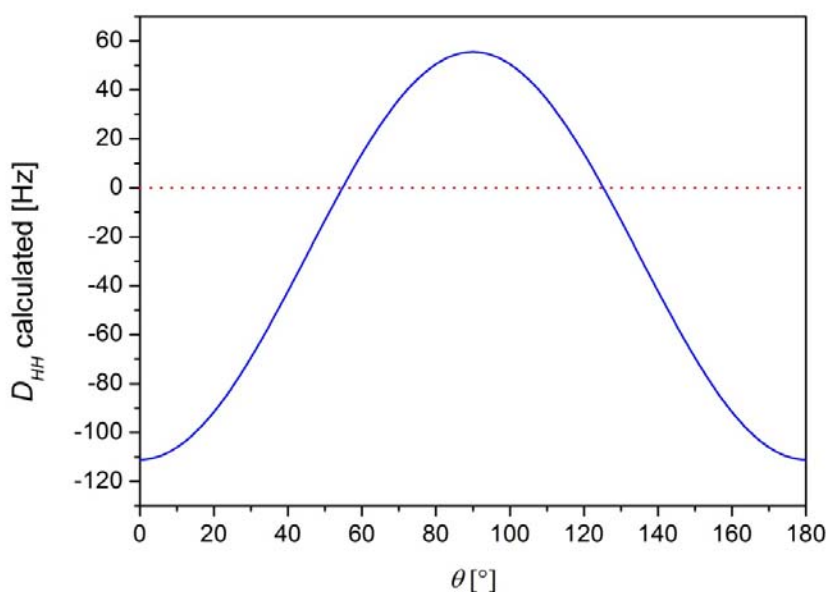

**Figure S25.** The dependence of the calculated <sup>1</sup>H-<sup>1</sup>H RDC from the  $\theta$  angle in equation 10. For this calculation, *T* was set to 295.0 K, the <sup>1</sup>H-<sup>1</sup>H distance was set to 1.78486 Å and the magnetic susceptibility anisotropy value was taken from Table S7.



|                    |                                    | $T$ [K]                                                                   |        |        |        |        |       |
|--------------------|------------------------------------|---------------------------------------------------------------------------|--------|--------|--------|--------|-------|
|                    |                                    | 265.0                                                                     | 275.0  | 285.0  | 295.0  | 305.0  | 315.0 |
| Group:             | Comments:                          | $D_{CH}$ in $^{13}\text{C}$ NMR spectra as calculated from the model [Hz] |        |        |        |        |       |
| CH <sub>2</sub> αi |                                    | -134.8                                                                    | -114.3 | -98.0  | -82.3  | -71.8  | -59.8 |
| CH <sub>2</sub> βi |                                    | -135.0                                                                    | -114.5 | -98.2  | -82.3  | -71.8  | -59.8 |
| CH <sub>2</sub> γi |                                    | -135.0                                                                    | -114.5 | -98.2  | -82.3  | -71.8  | -59.8 |
| CH <sub>3</sub> i  | 1st $^1\text{H}$                   | -140.4                                                                    | -119.0 | -102.1 | -85.6  | -74.7  | -62.2 |
|                    | 2nd $^1\text{H}$                   | 134.8                                                                     | 114.3  | 98.0   | 82.3   | 71.8   | 59.8  |
|                    | 3rd $^1\text{H}$                   | -129.4                                                                    | -109.8 | -94.1  | -79.0  | -68.8  | -57.3 |
|                    | averaged <sup>b)</sup>             | -44.9                                                                     | -38.2  | -32.7  | -27.5  | -23.9  | -20.0 |
| CH <sub>ar</sub> i |                                    | 139.4                                                                     | 118.4  | 101.5  | 85.2   | 74.2   | 61.8  |
| CH <sub>2</sub> αo | farther $^1\text{H}$ <sup>a)</sup> | -147.2                                                                    | -124.9 | -107.1 | -89.8  | -78.4  | -65.2 |
|                    | closer $^1\text{H}$ <sup>a)</sup>  | -70.7                                                                     | -60.0  | -51.4  | -43.2  | -37.7  | -31.3 |
| CH <sub>2</sub> βo | farther $^1\text{H}$ <sup>a)</sup> | -85.8                                                                     | -72.8  | -62.4  | -52.4  | -45.7  | -38.0 |
|                    | closer $^1\text{H}$ <sup>a)</sup>  | -143.5                                                                    | -121.9 | -104.5 | -87.6  | -76.4  | -63.6 |
| CH <sub>2</sub> γo | farther $^1\text{H}$ <sup>a)</sup> | -195.6                                                                    | -166.0 | -142.3 | -119.3 | -104.1 | -86.6 |
|                    | closer $^1\text{H}$ <sup>a)</sup>  | -44.3                                                                     | -37.5  | -32.1  | -27.0  | -23.5  | -19.6 |
|                    | averaged <sup>c)</sup>             | -119.9                                                                    | -101.6 | -87.2  | -73.1  | -63.8  | -53.1 |
|                    | 1st $^1\text{H}$                   | -54.1                                                                     | -45.9  | -39.4  | -33.0  | -28.9  | -24.0 |
| CH <sub>3</sub> o  | 2nd $^1\text{H}$                   | 107.9                                                                     | 91.5   | 78.5   | 65.8   | 57.4   | 47.8  |
|                    | 3rd $^1\text{H}$                   | -187.6                                                                    | -159.2 | -136.5 | -114.6 | -99.9  | -83.1 |
|                    | averaged <sup>b)</sup>             | -44.6                                                                     | -37.9  | -32.4  | -27.2  | -23.8  | -19.7 |
| CH <sub>ar</sub> o | averaged <sup>d)</sup>             | 136.4                                                                     | 115.8  | 99.3   | 83.3   | 72.6   | 60.5  |

**Table S32.** Static residual <sup>13</sup>C-<sup>1</sup>H dipolar couplings as calculated from the modeled structure of **1**. a) The calculated RDCs for the two <sup>13</sup>C-<sup>1</sup>H vectors in each methylene group of the outer ligand are different from each other, and are hence distinguished by qualitatively describing how far their <sup>1</sup>H in vectors are from the two terbium centers. b) For the methyl groups of both the inner and outer ligand, the average value of the RDC for the three <sup>13</sup>C-<sup>1</sup>H vectors was taken for further calculations. c) For the CH<sub>2</sub>γo group, since the <sup>13</sup>C resonance gave a triplet, i.e. there is only one observable <sup>1</sup>*T<sub>CH</sub>*, the average of the two values of the calculated RDCs was taken for further calculations. d) For the CH<sub>ar</sub>o group, the value of the calculated RDC reported in this table represents an average of the RDCs calculated from all eight individual <sup>13</sup>C-<sup>1</sup>H vectors in the asymmetric unit of the X-Ray structure, with the C-H bond length set to 1.081 Å. The values reported here were calculated with magnetic susceptibility anisotropy values from Table S36.

| Group:             | <i>T</i> [K]                                                                          |        |        |        |        |        |
|--------------------|---------------------------------------------------------------------------------------|--------|--------|--------|--------|--------|
|                    | 265.0                                                                                 | 275.0  | 285.0  | 295.0  | 305.0  | 315.0  |
|                    | <i>D<sub>HH</sub></i> in <sup>1</sup> H NMR spectra as calculated from the model [Hz] |        |        |        |        |        |
| CH <sub>2</sub> αi | -246.3                                                                                | -209.0 | -179.2 | -150.3 | -131.1 | -109.1 |
| CH <sub>2</sub> βi | -246.3                                                                                | -209.0 | -179.2 | -150.3 | -131.1 | -109.1 |
| CH <sub>2</sub> αo | -208.7                                                                                | -177.1 | -151.9 | -127.4 | -111.1 | -92.4  |
| CH <sub>2</sub> βo | -217.6                                                                                | -184.5 | -158.2 | -132.9 | -115.8 | -96.4  |

**Table S33.** Residual <sup>1</sup>H-<sup>1</sup>H dipolar couplings as calculated from the modeled structure of **1**. The values reported here were calculated with magnetic susceptibility anisotropy values from Table S36.

| Group:             | Comments:                            | <i>T</i> [K]                                                                  |             |             |             |             |             |
|--------------------|--------------------------------------|-------------------------------------------------------------------------------|-------------|-------------|-------------|-------------|-------------|
|                    |                                      | 265.0                                                                         | 275.0       | 285.0       | 295.0       | 305.0       | 315.0       |
|                    |                                      | Order parameter <i>S<sub>i</sub></i> as calculated from <i>D<sub>CH</sub></i> |             |             |             |             |             |
| CH <sub>2</sub> αi |                                      | 0.74 (0.04)                                                                   | 0.82 (0.04) | 0.83 (0.05) | 0.87 (0.06) | N. A.       | 0.94 (0.08) |
| CH <sub>2</sub> βi |                                      | N. A.                                                                         | 0.24 (0.01) | 0.28 (0.02) | 0.34 (0.02) | 0.35 (0.03) | 0.31 (0.02) |
| CH <sub>2</sub> γi |                                      | N. A.                                                                         | 0.07 (0.01) | 0.09 (0.01) | 0.10 (0.01) | 0.10 (0.02) | 0.11 (0.03) |
| CH <sub>3</sub> i  |                                      | 0.21 (0.01)                                                                   | 0.23 (0.01) | 0.23 (0.01) | 0.25 (0.11) | N. A.       | 0.24 (0.05) |
| CH <sub>ar</sub> i |                                      | 1.00 (0.04)                                                                   | 1.00 (0.04) | 1.00 (0.05) | 1.00 (0.06) | 1.00 (0.09) | 1.00 (0.08) |
|                    | farther <sup>1</sup> H <sup>a)</sup> | 0.90 (0.01)                                                                   | 0.89 (0.02) | 0.84 (0.02) | 0.87 (0.02) | 0.84 (0.06) | 0.82 (0.03) |
| CH <sub>2</sub> αo | closer <sup>1</sup> H <sup>a)</sup>  | 0.94 (0.03)                                                                   | 0.96 (0.03) | 0.95 (0.04) | 0.98 (0.05) | 0.96 (0.08) | 1.02 (0.06) |
|                    | average <sup>b)</sup>                | 0.92 (0.02)                                                                   | 0.92 (0.02) | 0.90 (0.03) | 0.92 (0.03) | 0.90 (0.07) | 0.92 (0.05) |
|                    | farther <sup>1</sup> H <sup>a)</sup> | 0.14 (0.01)                                                                   | 0.16 (0.01) | 0.16 (0.02) | 0.19 (0.02) | 0.18 (0.02) | 0.20 (0.01) |
| CH <sub>2</sub> βo | closer <sup>1</sup> H <sup>a)</sup>  | 0.35 (0.01)                                                                   | 0.34 (0.01) | 0.32 (0.01) | 0.30 (0.01) | 0.32 (0.02) | 0.32 (0.01) |
|                    | average <sup>b)</sup>                | 0.24 (0.01)                                                                   | 0.25 (0.01) | 0.24 (0.01) | 0.25 (0.02) | 0.25 (0.02) | 0.26 (0.01) |
| CH <sub>2</sub> γo |                                      | N. A.                                                                         | 0.06 (0.02) | 0.04 (0.02) | 0.03 (0.02) | 0.01 (0.01) | 0.00 (0.02) |
| CH <sub>3</sub> o  |                                      | 0.23 (0.02)                                                                   | 0.22 (0.01) | 0.19 (0.03) | 0.20 (0.04) | 0.21 (0.08) | 0.21 (0.08) |
| CH <sub>ar</sub> o |                                      | N. A.                                                                         | 1.09 (0.03) | 1.13 (0.04) | 1.18 (0.04) | 1.21 (0.09) | 1.29 (0.03) |

**Table S34.** Order parameters derived from combining the model fitted to <sup>13</sup>C NMR pseudocontact shifts with the experimentally obtained <sup>13</sup>C-<sup>1</sup>H residual dipolar couplings. “N. A.” denotes cases where the extraction of <sup>1</sup>*T<sub>CH</sub>* was not possible due to signal broadness or overlaps. Order parameters were not calculated from data recorded at 265.0 K, because of many signal overlaps. Standard deviations are given in brackets. a) A distinction is made between the two <sup>13</sup>C-<sup>1</sup>H vectors of the two diastereotopic methylene groups. b) For the methylene groups whose <sup>13</sup>C NMR resonances are doublets of doublets (two RDCs due to both <sup>13</sup>C-<sup>1</sup>H vectors were obtained), the final order parameter is taken to be the average of the order parameters calculated from the two <sup>13</sup>C-<sup>1</sup>H RDCs.

|                            | $T$ [K]                                           |               |               |               |               |               |
|----------------------------|---------------------------------------------------|---------------|---------------|---------------|---------------|---------------|
|                            | 265.0                                             | 275.0         | 285.0         | 295.0         | 305.0         | 315.0         |
| Group:                     | Order parameter $S$ , as calculated from $D_{HH}$ |               |               |               |               |               |
| CH <sub>2</sub> $\alpha$ i | 0.704 (0.006)                                     | 0.722 (0.007) | 0.723 (0.008) | 0.724 (0.010) | 0.677 (0.019) | 0.619 (0.014) |
| CH <sub>2</sub> $\beta$ i  | 0.166 (0.008)                                     | 0.149 (0.014) | 0.13 (0.020)  | 0.096 (0.033) | N. A.         | N. A.         |
| CH <sub>2</sub> $\alpha$ o | 0.752 (0.010)                                     | 0.745 (0.006) | 0.726 (0.013) | 0.741 (0.016) | 0.703 (0.023) | 0.698 (0.022) |
| CH <sub>2</sub> $\beta$ o  | 0.177 (0.009)                                     | 0.16 (0.011)  | 0.139 (0.013) | 0.146 (0.015) | 0.084 (0.017) | 0.006 (0.052) |

**Table S35.** Order parameters derived from combining the modeled alkyl chains of the inner and outer phthalocyaninato ring with the experimentally obtained <sup>1</sup>H-<sup>1</sup>H residual dipolar couplings. Standard deviations are given in brackets.

| $T$ [K] | $\chi_a$ [m <sup>3</sup> ] |
|---------|----------------------------|
| 265.0   | 20.24E-31                  |
| 275.0   | 17.82E-31                  |
| 285.0   | 15.84E-31                  |
| 295.0   | 13.75E-31                  |
| 305.0   | 12.40E-31                  |
| 315.0   | 10.66E-31                  |

**Table S36.**  $\chi_a$  values as calculated from the residual dipolar couplings of group CH<sub>ar</sub>i (given in Table S30), using equation 10.  $r_{CH}$  was set to 1.081 Å and  $\theta$  was set to 90°.

#### IX. Additional information (Eq. S12-S14, Fig. S27-S29, Table S37)

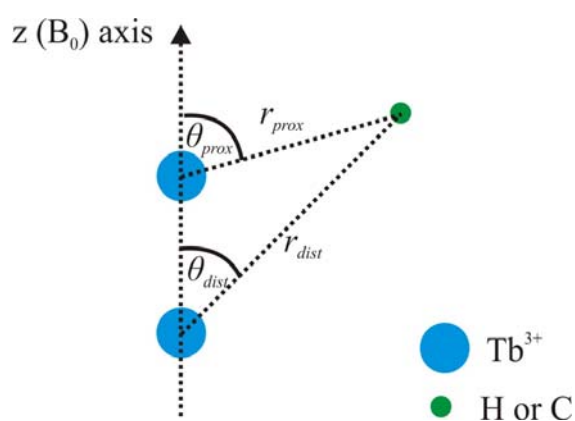

**Figure S26.** Definitions of  $\theta_{prox}$ ,  $\theta_{dist}$ ,  $r_{prox}$  and  $r_{dist}$  used in equation 8.

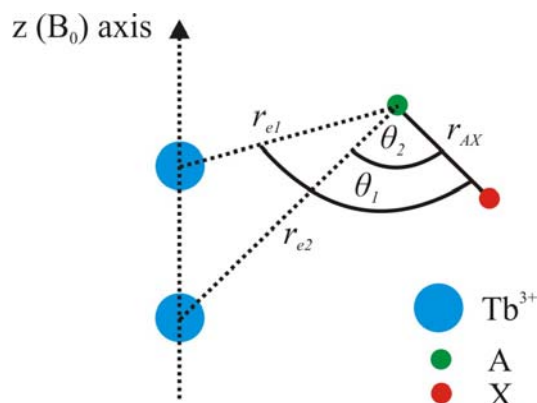

**Figure S27.** Definitions of  $\theta_1$ ,  $\theta_2$ ,  $r_{e1}$ ,  $r_{e2}$  and  $r_{AX}$  used in equation S7.

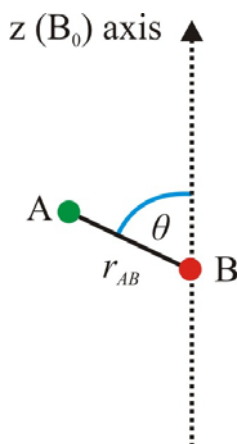

**Figure S28.** Definitions of  $\theta$ , and  $r_{AB}$  used in equation 10.

### Calculating RDCs from the modeled groups

Given here is a description on how the RDCs were calculated from the model. The calculation shown here is for  $^{13}C$ - $^1H$  RDCs, but the same approach applies to calculating the  $^1H$ - $^1H$  RDCs.

For every bonded  $^{13}C$  and  $^1H$  nucleus, their coordinates (in terms of distance  $r$  and angle  $\theta$  with their meanings as in Figure S28, relative to any one of the two metal centers of **1**) were taken from the model used to fit the  $^{13}C$  NMR pseudocontact shift data. The distance of the projection of each of these nuclei ( $d_{Tb}^z(^1H)$  and  $d_{Tb}^z(^{13}C)$ ) on the  $z$  axis from the terbium ion was calculated with equations S12-S13:

$$d_{Tb}^z(^1H) = r_H \sin(90^\circ - \theta_H) \quad (S12)$$

$$d_{Tb}^z(^{13}C) = r_C \sin(90^\circ - \theta_C) \quad (S13)$$

Where  $r_H$  and  $\theta_H$  are the coordinates of the  $^1\text{H}$  and  $r_C$  and  $\theta_C$  are the coordinates of the  $^{13}\text{C}$ . The difference between  $d_{\text{Tb}}^z(^1\text{H})$  and  $d_{\text{Tb}}^z(^{13}\text{C})$  is related to the orientation of the  $^{13}\text{C}$ - $^1\text{H}$  vector, as is shown in equation S14:

$$\theta = \arccos\left(\frac{|d_{\text{Tb}}^z(^{13}\text{C}) - d_{\text{Tb}}^z(^1\text{H})|}{d(\text{C}-\text{H})}\right) \quad (\text{S14})$$

Where  $\theta$  describes the orientation of the  $^{13}\text{C}$ - $^1\text{H}$  vector relative to the  $B_0$  axis (equation 10, Figure S28) and  $d(\text{C}-\text{H})$  is the length of the C-H bond (values as reported in the main text). With  $d(\text{C}-\text{H})$  and  $\theta$  known, it was possible to calculate the RDCs given in Table S32 (accordingly, Table S33 for  $^1\text{H}$ - $^1\text{H}$  RDCs).

### Compound 1

IUPAC Name:

Terbium, [ $\mu$ -[2,3,9,10,16,17,23,24-octabutoxy-29H,31H-phthalocyaninato(2-)- $\kappa\text{N}^{29}, \kappa\text{N}^{30}, \kappa\text{N}^{31}, \kappa\text{N}^{32} : \kappa\text{N}^{29}, \kappa\text{N}^{30}, \kappa\text{N}^{31}, \kappa\text{N}^{32}$ ]]bis[2,3,9,10,16,17,23,24-octabutoxy-29H,31H-phthalocyaninato(2-)- $\kappa\text{N}^{29}, \kappa\text{N}^{30}, \kappa\text{N}^{31}, \kappa\text{N}^{32}$ ]]di-Coordination Compound;

CAS Registry Number:

1269611-92-8;

Chemical Formula:

$\text{C}_{192} \text{H}_{240} \text{N}_{24} \text{O}_{24} \text{Tb}_2$ ;

Commonly abbreviated in literature as:

$\text{Tb}_2(\text{obPc})_3$ .

| Constant                                         | Symbol     | Value                                                      |
|--------------------------------------------------|------------|------------------------------------------------------------|
| Gyromagnetic ratio for a $^1\text{H}$ nucleus    | $\gamma_H$ | $2.67522128 \cdot 10^8 \text{ s}^{-1} \text{ T}^{-1}$      |
| Gyromagnetic ratio for a $^{13}\text{C}$ nucleus | $\gamma_C$ | $6.728284 \cdot 10^7 \text{ s}^{-1} \text{ T}^{-1}$        |
| Gyromagnetic ratio for an isolated electron      | $\gamma_e$ | $-1.760859708 \cdot 10^{11} \text{ s}^{-1} \text{ T}^{-1}$ |
| Boltzmann constant                               | $k$        | $1.380658 \cdot 10^{-23} \text{ J K}^{-1}$                 |
| Vacuum permeability                              | $\mu_0$    | $1.256367061 \cdot 10^{-6} \text{ H m}^{-1}$               |
| Planck constant                                  | $h$        | $6.6260755 \cdot 10^{-34} \text{ J s}$                     |
|                                                  | $\hbar$    | $1.05457266 \cdot 10^{-34} \text{ J s}$                    |
| Electron g-factor                                | $g_e$      | -2.002319304                                               |
| Electronic Bohr magneton                         | $\mu_e$    | $9.27400968 \cdot 10^{-24} \text{ J T}^{-1}$               |

**Table S37.** Physical constants used in this work.<sup>viii</sup>

## X. Experimental section (Table S38)

Terbium triple decker **1** was prepared according to a published procedure.<sup>ix</sup>

NMR spectra were recorded at 7.9 T with a Bruker Avance II instrument equipped with a BBFO probe and at 14.09 T with a Bruker Avance III instrument equipped with a QNP Cryoprobe (inner coil tuned to <sup>13</sup>C, cold preamplifier). Temperatures have been calibrated using the method of Berger et al.<sup>x</sup> Solvent resonances were taken as references for all <sup>1</sup>H and <sup>13</sup>C NMR spectra.

The deuterated solvents (CD<sub>2</sub>Cl<sub>2</sub>, toluene-d<sup>8</sup>, Sigma-Aldrich) were dried before use.

### NMR Experiments

| Experiment:                            | <sup>1</sup> H NMR |           | <sup>13</sup> C NMR | <sup>13</sup> C { <sup>1</sup> H} NMR |
|----------------------------------------|--------------------|-----------|---------------------|---------------------------------------|
| <i>B</i> <sub>0</sub> [T]:             | 7.90               | 14.09     | 14.09               | 14.09                                 |
| Pulse Sequence:                        | zg30               | zg30      | zg                  | zgdc                                  |
| Sweep Width [ppm]:                     | 500                | 500       | 592                 | 592                                   |
| Acquisition Time [sec]:                | 0.1089867          | 0.1089867 | 0.1822912           | 0.0917504                             |
| Dwell Time [μsec]:                     | 2.500              | 1.667     | 5.600               | 5.600                                 |
| Pre-Scan Delay [μsec]:                 | 6.500              | 10.000    | 100.0               | 100.0                                 |
| Frequency of Channel 1 [ppm]:          | -100.000           | -200.000  | -150.000            | -150.000                              |
| Relaxation Delay [μsec]:               | 0.200              | 0.050     | 0.050               | 0.050                                 |
| Channel 1 - 90° Pulse Duration [μsec]: | 11.50              | 14.60     | 12.00               | 12.00                                 |
| Second Channel:                        | /                  | /         | /                   | <sup>1</sup> H                        |
| CPD program:                           | /                  | /         | /                   | garp4                                 |
| Channel 2 - 90° Pulse Duration [μsec]: | /                  | /         | /                   | 70.00                                 |
| Frequency of Channel 2 [ppm]:          | /                  | /         | /                   | -6.000                                |

**Table S38.** Basic parameters used for acquiring 1D NMR spectra on instruments mentioned above.

The <sup>13</sup>C NMR spectra were processed in the following way: After zero filling to 64k real data points the first points of the FID were eliminated and typically 96 data points were backpredicted in order to reduce base line rolling. An exponential window function (e.g. lb=5Hz) was applied or a lorentz-gauss transformation (lb=-10Hz, gb=0.2).

The referencing was done by using the resonances of the solvent signals. The values were taken from the work of Fulmer et al..<sup>xi</sup>

**<sup>1</sup>H NMR of complex 1:**

(600.13 MHz, in CD<sub>2</sub>Cl<sub>2</sub>, *T* = 265.0 K)

$\delta$  [ppm] = -210.86 (s, 2H, CH<sub>ar</sub>i), -95.93 (d, *T*(H,H) = -259.9 Hz, 4H, CH<sub>2</sub>αi), -73.54 (s, 4H, CH<sub>ar</sub>o), -54.38 (d, *T*(H,H) = -61.5 Hz, 4H, CH<sub>2</sub>βi), -53.68 (d, *T*(H,H) = -166.6 Hz, 4H, CH<sub>2</sub>αo), -47.99 (s, 4H, CH<sub>2</sub>γi), -35.16 (s, 6H, CH<sub>3</sub>i), -26.83 (d, *T*(H,H) = -50.8 Hz, 4H, CH<sub>2</sub>βo), -25.36 (d, *T*(H,H) = -50.9 Hz, 4H, CH<sub>2</sub>βo), -24.05 (d, *T*(H,H) = -168.9 Hz, 4H, CH<sub>2</sub>αo), -22.16 (s, 8H, CH<sub>2</sub>γo), -16.40 (s, 12H, CH<sub>3</sub>o).

(600.13 MHz, in CD<sub>2</sub>Cl<sub>2</sub>, *T* = 275.0 K)

$\delta$  [ppm] = -194.94 (s, 2H, CH<sub>ar</sub>i), -88.33 (d, *T*(H,H) = -226.3 Hz, 4H, CH<sub>2</sub>αi), -67.44 (s, 4H, CH<sub>ar</sub>o), -50.40 (d, *T*(H,H) = -46.6 Hz, 4H, CH<sub>2</sub>βi), -48.55 (d, *T*(H,H) = -141.6 Hz, 4H, CH<sub>2</sub>αo), -44.33 (s, 4H, CH<sub>2</sub>γi), -32.73 (s, 6H, CH<sub>3</sub>i), -24.46 (d, *T*(H,H) = -42.0 Hz, 4H, CH<sub>2</sub>βo), -23.25 (d, *T*(H,H) = -42.0 Hz, 4H, CH<sub>2</sub>βo), -21.93 (d, *T*(H,H) = -144.0 Hz, 4H, CH<sub>2</sub>αo), -20.28 (s, 4H, CH<sub>2</sub>γo), -20.11 (s, 4H, CH<sub>2</sub>γo), -16.40 (s, 12H, CH<sub>3</sub>o).

(600.13 MHz, in CD<sub>2</sub>Cl<sub>2</sub>, *T* = 285.0 K)

$\delta$  [ppm] = -180.25 (s, 2H, CH<sub>ar</sub>i), -81.39 (d, *T*(H,H) = -194.2 Hz, 4H, CH<sub>2</sub>αi), -61.85 (s, 4H, CH<sub>ar</sub>o), -46.70 (d, *T*(H,H) = -35.0 Hz, 4H, CH<sub>2</sub>βi), -43.93 (d, *T*(H,H) = -121.5 Hz, 4H, CH<sub>2</sub>αo), -41.00 (s, 4H, CH<sub>2</sub>γi), -30.49 (s, 6H, CH<sub>3</sub>i), -22.31 (d, *T*(H,H) = -33.9 Hz, 4H, CH<sub>2</sub>βo), -21.32 (d, *T*(H,H) = -34.8 Hz, 4H, CH<sub>2</sub>βo), -20.04 (d, *T*(H,H) = -122.7 Hz, 4H, CH<sub>2</sub>αo), -18.56 (s, 4H, CH<sub>2</sub>γo), -18.34 (s, 4H, CH<sub>2</sub>γo), -13.78 (s, 12H, CH<sub>3</sub>o).

(600.13 MHz, in CD<sub>2</sub>Cl<sub>2</sub>, *T* = 295.0 K)

$\delta$  [ppm] = -167.19 (s, 2H, CH<sub>ar</sub>i), -75.17 (d, *T*(H,H) = -163.3 Hz, 4H, CH<sub>2</sub>αi), -56.90 (s, 4H, CH<sub>ar</sub>o), -43.43 (d, *T*(H,H) = -21.6 Hz, 4H, CH<sub>2</sub>βi), -39.87 (d, *T*(H,H) = -104.7 Hz, 4H, CH<sub>2</sub>αo), -38.02 (s, 4H, CH<sub>2</sub>γi), -28.47 (s, 6H, CH<sub>3</sub>i), -20.40 (d, *T*(H,H) = -31.7 Hz, 4H, CH<sub>2</sub>βo), -19.60 (d, *T*(H,H) = -31.8 Hz, 4H, CH<sub>2</sub>βo), -18.39 (d, *T*(H,H) = -105.6 Hz, 4H, CH<sub>2</sub>αo), -17.07 (s, 4H, CH<sub>2</sub>γo), -16.82 (s, 4H, CH<sub>2</sub>γo), -12.72 (s, 12H, CH<sub>3</sub>o).

(600.13 MHz, in CD<sub>2</sub>Cl<sub>2</sub>, *T* = 305.0 K)

$\delta$  [ppm] = -155.53 (s, 2H, CH<sub>ar</sub>i), -69.58 (d, *T*(H,H) = -133.0 Hz, 4H, CH<sub>2</sub>αi), -52.47 (s, 4H, CH<sub>ar</sub>o), -40.50 (s, 4H, CH<sub>2</sub>βi), -36.31 (d, *T*(H,H) = -87.0 Hz, 4H, CH<sub>2</sub>αo), -35.36 (s, 4H, CH<sub>2</sub>γi), -26.64 (s, 6H, CH<sub>3</sub>i), -18.76 (d, *T*(H,H) = -21.7 Hz, 4H, CH<sub>2</sub>βo), -18.10 (d, *T*(H,H) = -22.5 Hz, 4H, CH<sub>2</sub>βo), -16.96 (d, *T*(H,H) = -90.7 Hz, 4H, CH<sub>2</sub>αo), -15.76 (s, 4H, CH<sub>2</sub>γo), -15.50 (s, 4H, CH<sub>2</sub>γo), -11.80 (s, 12H, CH<sub>3</sub>o).

(600.13 MHz, in CD<sub>2</sub>Cl<sub>2</sub>,  $T = 315.0$  K)

$\delta$  [ppm] = -144.95 (s, 2H, CH<sub>ar</sub>i), -64.51 (d,  $T(\text{H,H}) = -101.2$  Hz, 4H, CH<sub>2</sub> $\alpha$ i), -48.44 (s, 4H, CH<sub>ar</sub>o), -37.82 (s, 4H, CH<sub>2</sub> $\beta$ i), -33.17 (d,  $T(\text{H,H}) = -75.3$  Hz, 4H, CH<sub>2</sub> $\alpha$ o), -32.92 (s, 4H, CH<sub>2</sub> $\gamma$ i), -24.93 (s, 6H, CH<sub>3</sub>i), -17.29 (d,  $T(\text{H,H}) = -12.9$  Hz, 4H, CH<sub>2</sub> $\beta$ o), -16.74 (d,  $T(\text{H,H}) = -13.0$  Hz, 4H, CH<sub>2</sub> $\beta$ o), -15.66 (d,  $T(\text{H,H}) = -75.2$  Hz, 4H, CH<sub>2</sub> $\alpha$ o), -14.58 (s, 4H, CH<sub>2</sub> $\gamma$ o), -14.28 (s, 4H, CH<sub>2</sub> $\gamma$ o), -10.96 (s, 12H, CH<sub>3</sub>o).

(600.13 MHz, in toluene-d<sup>8</sup>,  $T = 295.0$  K)

$\delta$  [ppm] = -140.98 (s, 2H, CH<sub>ar</sub>i), -65.53 (d,  $T(\text{H,H}) = -158.0$  Hz, 4H, CH<sub>2</sub> $\alpha$ i), -37.73 (s, 4H, CH<sub>ar</sub>o), -34.94 (broad s, 4H, CH<sub>2</sub> $\beta$ i), -32.01 (s, 4H, CH<sub>2</sub> $\gamma$ i), -30.63 (d,  $T(\text{H,H}) = -81.6$  Hz, 4H, CH<sub>2</sub> $\alpha$ o), -22.72 (s, 6H, CH<sub>3</sub>i), -13.51 (s, 8H, CH<sub>2</sub> $\beta$ o), -8.64 (d,  $T(\text{H,H}) = -104.0$  Hz, 4H, CH<sub>2</sub> $\alpha$ o), -11.30 (s, 8H, CH<sub>2</sub> $\gamma$ o), -8.09 (s, 12H, CH<sub>3</sub>o).

### <sup>13</sup>C NMR of complex 1:

(600.13 MHz, in CD<sub>2</sub>Cl<sub>2</sub>,  $T = 295.0$  K)

$\delta$  [ppm] = -252.1 ( $\nu_{1/2} = 215.7$  Hz, s, C<sub>q</sub>i), -86.5 ( $\nu_{1/2} = 175.7$  Hz, d,  $^1T_{CH} = 223.0$  Hz, CH<sub>ar</sub>i), -63.3 ( $\nu_{1/2} = 179.3$  Hz, s, C<sub>q</sub>o), -19.6 ( $\nu_{1/2} = 24.7$  Hz, t,  $^1T_{CH} = 113.4$  Hz, CH<sub>2</sub> $\gamma$ i), -17.4 ( $\nu_{1/2} = 32.3$  Hz, t,  $^1T_{CH} = 94.0$  Hz, CH<sub>2</sub> $\beta$ i), -16.7 ( $\nu_{1/2} = 21.2$  Hz, q,  $^1T_{CH} = 116.5$  Hz, CH<sub>3</sub>i), -4.1 ( $\nu_{1/2} = 44.5$  Hz, t,  $^1T_{CH} = 65.0$  Hz, CH<sub>2</sub> $\alpha$ i), -0.8 ( $\nu_{1/2} = 56.6$  Hz, s, C<sub>q</sub>o<sub>i</sub>), 0.0 ( $\nu_{1/2} = 16.4$  Hz, q,  $^1T_{CH} = 118.4$  Hz, CH<sub>3</sub>o), 1.7 ( $\nu_{1/2} = 28.1$  Hz, t,  $^1T_{CH} = 121.6$  Hz, CH<sub>2</sub> $\gamma$ o), 9.3 ( $\nu_{1/2} = 27.8$  Hz, dd,  $^1T_{1stCH} = 95.0$  Hz,  $^1T_{2ndCH} = 113.0$  Hz, CH<sub>2</sub> $\beta$ o), 23.8 ( $\nu_{1/2} = 126.7$  Hz, d,  $^1T_{CH} = 242.0$  Hz, CH<sub>ar</sub>o), 37.9 ( $\nu_{1/2} = 47.4$  Hz, dd,  $^1T_{1stCH} = 58.0$  Hz,  $^1T_{2ndCH} = 96.0$  Hz, CH<sub>2</sub> $\alpha$ o), 94.8 ( $\nu_{1/2} = 36.2$  Hz, s, C<sub>q</sub>o<sub>o</sub>).

(600.13 MHz, in toluene-d<sup>8</sup>,  $T = 295.0$  K)

$\delta$  [ppm] = -210.2 ( $\nu_{1/2} = 262.4$  Hz, s, C<sub>q</sub>i), -56.5 ( $\nu_{1/2} = 139.2$  Hz, d,  $^1T_{CH} = 210.2$  Hz, CH<sub>ar</sub>i), -49.2 ( $\nu_{1/2} = 223.4$  Hz, s, C<sub>q</sub>o), -13.4 ( $\nu_{1/2} = 26.2$  Hz, t,  $^1T_{CH} = 111.1$  Hz, CH<sub>2</sub> $\gamma$ i), -10.8 ( $\nu_{1/2} = 20.8$  Hz, q,  $^1T_{CH} = 94.0$  Hz, CH<sub>3</sub>i), -8.6 ( $\nu_{1/2} = 29.2$  Hz, t,  $^1T_{CH} = 88.0$  Hz, CH<sub>2</sub> $\beta$ i), 4.8 ( $\nu_{1/2} = 18.1$  Hz, q,  $^1T_{CH} = 119.1$  Hz, CH<sub>3</sub>o), 6.3 ( $\nu_{1/2} = 44.3$  Hz, t,  $^1T_{CH} = 56.0$  Hz, CH<sub>2</sub> $\alpha$ i), 7.2 ( $\nu_{1/2} = 30.7$  Hz, t,  $^1T_{CH} = 125.4$  Hz, CH<sub>2</sub> $\gamma$ o), 16.4 ( $\nu_{1/2} = 29.3$  Hz, t,  $^1T_{CH} = 107.7$  Hz, CH<sub>2</sub> $\beta$ o), 19.4 ( $\nu_{1/2} = 72.4$  Hz, s, C<sub>q</sub>o<sub>i</sub>), 42.2 ( $\nu_{1/2} = 116.7$  Hz, d,  $^1T_{CH} = 242.2$  Hz, CH<sub>ar</sub>o), 47.0 ( $\nu_{1/2} = 20.1$  Hz, dd,  $^1T_{1stCH} = 45.9$  Hz,  $^1T_{2ndCH} = 116.9$  Hz, CH<sub>2</sub> $\alpha$ o), 112.0 ( $\nu_{1/2} = 45.7$  Hz, s, C<sub>q</sub>o<sub>o</sub>).



XI. X-ray structure of complex **1** (Fig. S30-S32)

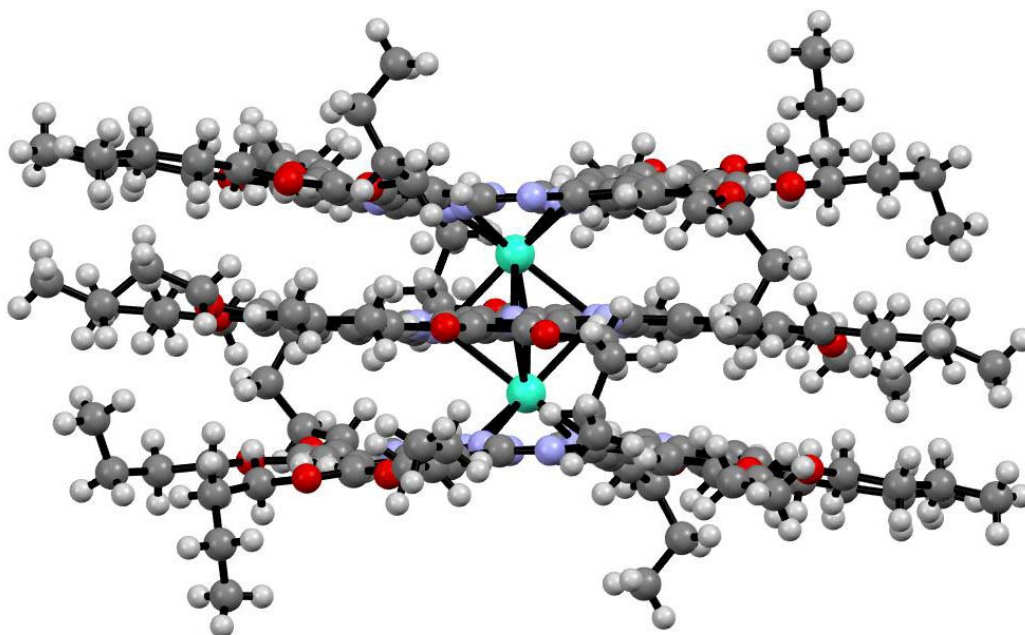

**Figure S29.** Crystal structure of complex **1**, side view.<sup>xii</sup>

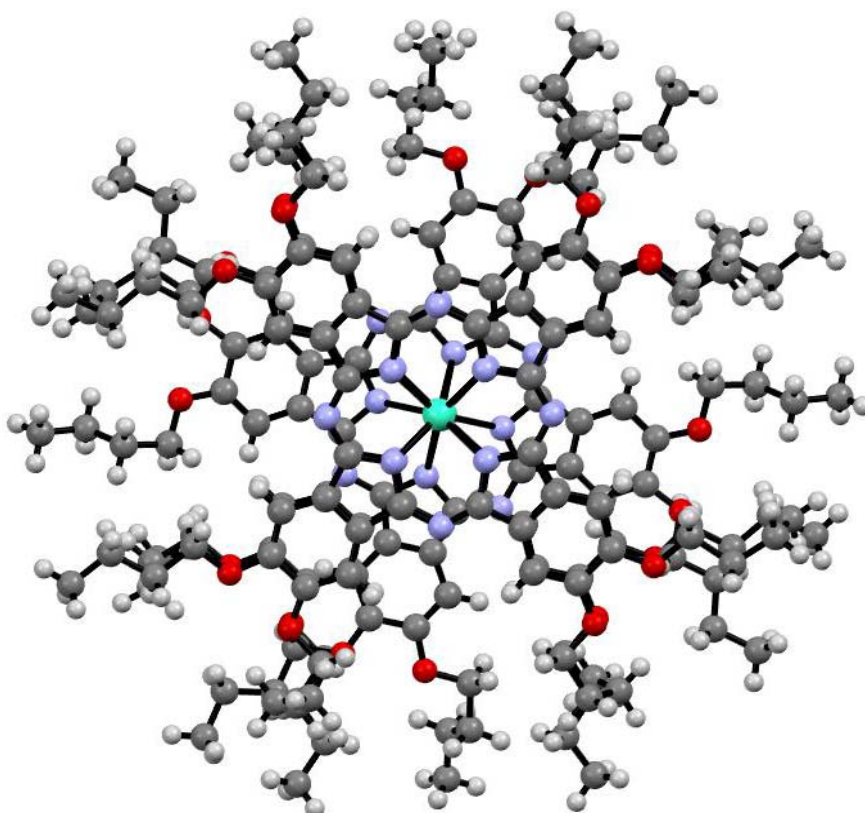

**Figure S30.** Crystal structure of complex **1**, top view.<sup>xii</sup>

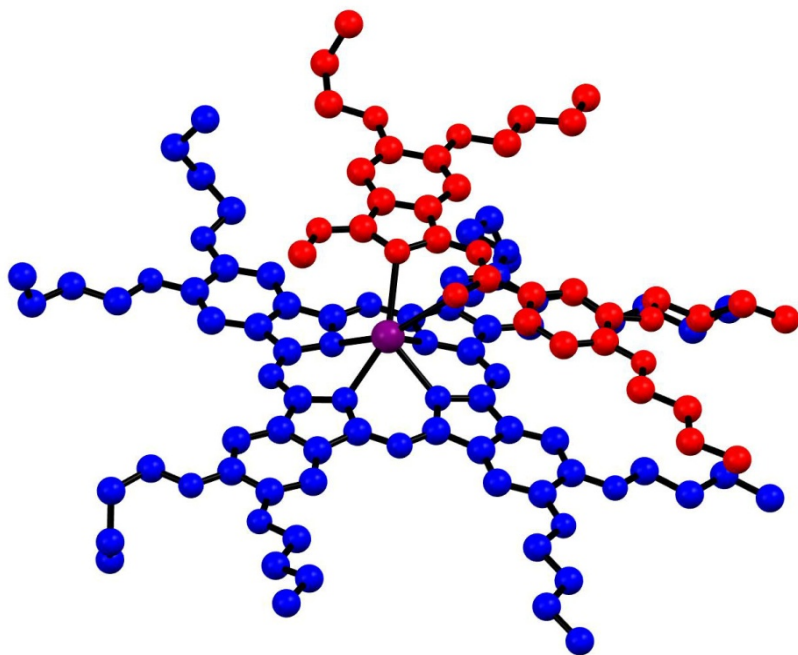

**Figure S31.** The asymmetric unit of complex **1**. Atoms of the inner ligand are colored red and atoms of the outer ligand are colored blue. The one terbium ion of the asymmetric unit is given here in purple color. Hydrogen atoms have been omitted for clarity.<sup>xii</sup>

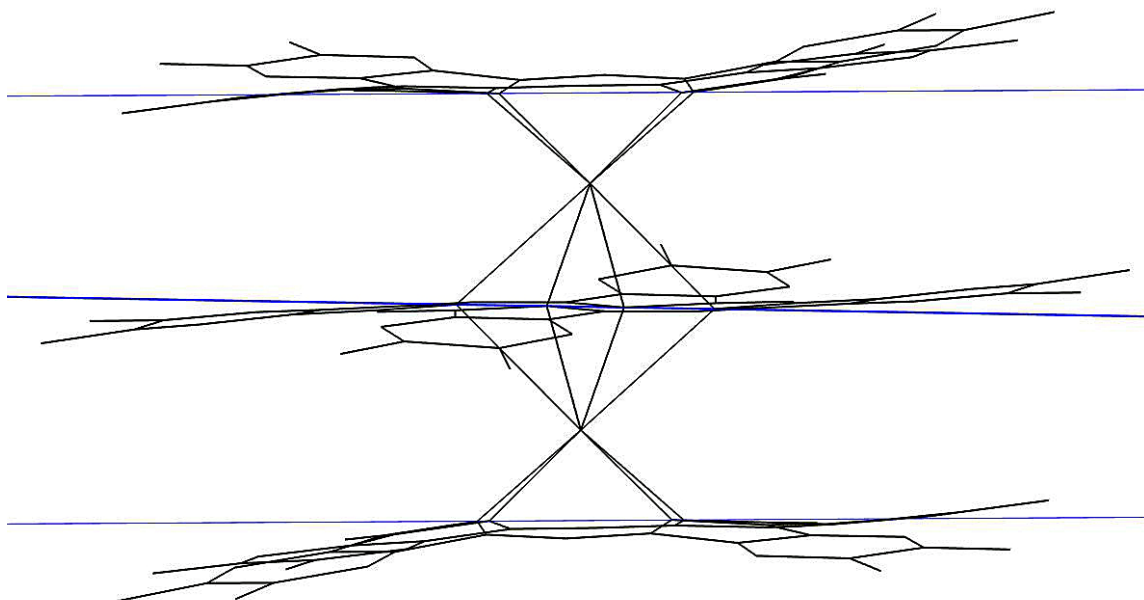

**Figure S32.** Wireframe side view of the crystal structure of complex **1**. For clarity, butyl groups have been omitted. Blue horizontal lines denote the planes of the phthalocyaninato ligands. In this perspective, distortions of the isoindole moieties from the planes of the rings are clearly visible.<sup>xii</sup>

## XII. Literature

- 
- (i) (a) Fürst, A.; Pretsch, E. *Anal. Chim. Acta* **1990**, 229, 17. (b) Pretsch, E.; Fürst, A.; Badertscher, M.; Bürgin, R.; Munk, M. E. *J. Chem. Inf. Comp. Sci.* **1992**, 32, 291. (c) Bürgin Schaller, R.; Pretsch, E. *Anal. Chim. Acta* **1994**, 290, 295. (d) Bürgin Schaller, R.; Arnold, C.; Pretsch, E. *Anal. Chim. Acta* **1995**, 312, 95. (e) Bürgin Schaller, R.; Munk, M. E.; Pretsch, E. *J. Chem. Inf. Comput. Sci.* **1996**, 36, 239.
- (ii) Ishikawa, N.; Iino, T.; Kaizu, Y. *J. Phys. Chem. A* **2003**, 107, 7879.
- (iii) Ghose, R.; Prestegard, J. H. *J. Magn. Reson.* **1997**, 128, 138.
- (iv) Cavanagh, J.; Fairbrother, W. J.; Palmer, A. G.; Rance, M.; Skelton, N. J. *Protein NMR Spectroscopy: Principles and Practice* (2<sup>nd</sup> Ed.), Academic Press, New York, London, **2006**.
- (v) (a) Timmermans, J.; Hennaut-Roland, M. *J. Chim. Phys.* **1932**, 29, 529. (b) Pal, C.; Kumar, A. *Fl. Phase Eq.* **1998**, 143, 241. (c) Phillips, T. W.; Murphy, K. P. *J. Chem. Eng. Data* **1970**, 15, 304.
- (vi) Li, D.; Kagan, G.; Hopson, R.; Williard, P. G. *J. Am. Chem. Soc.* **2009**, 131, 5627.
- (vii) (a) Pople, J. A.; Bothner-By, A. A. *J. Chem. Phys.* **1965**, 42, 1339. (b) Bernstein, H. J.; Sheppard, N. *J. Chem. Phys.* **1962**, 37, 3012. (c) Anet, F. A. L. *J. Am. Chem. Soc.* **1962**, 84, 3767. (d) Barfield, M.; Grant, D. M. *J. Am. Chem. Soc.* **1961**, 83, 4726. (e) Barfield, M.; Grant, D. M. *J. Chem. Phys.* **1962**, 36, 2054. (f) Barfield, M.; Grant, D. M. *J. Am. Chem. Soc.* **1963**, 85, 1899.
- (viii) Atkins, P.; de Paula, J. *Atkin's Physical Chemistry*, 9th ed., Oxford University Press, **2009**.
- (ix) Takahashi, K.; Itoh, M.; Tomita, Y.; Nojima, K.; Kasuga, K.; Isa, K. *Chem. Lett.* **1993**, 1915.
- (x) Findeisen, M.; Brand, T.; Berger, S. *Magn. Reson. Chem.* **2007**, 45, 175.
- (xi) Fulmer, G. R.; Miller, A. J. M.; Sherden, N. H.; Gottlieb, H. E.; Nudelman, A.; Stoltz, B. M.; Bercaw, J. E.; Goldberg, K. I. *Organometallics* **2010**, 29, 2176.
- (xii) Katoh, K.; Horii, Y.; Yasuda, N.; Wernsdorfer, W.; Toriumi, K.; Breedlove, B. K.; Yamashita, M. *Dalton Trans.* **2012**, 41, 13582.
